1 **Modernized Tools for Streamlined Genetic Manipulation of Wild and Diverse Symbiotic**  
2 **Bacteria**

3 Travis J. Wiles<sup>1,\*</sup>, Elena S. Wall<sup>1</sup>, Brandon H. Schlomann<sup>1,2</sup>, Edouard A. Hay<sup>2</sup>, Raghuveer  
4 Parthasarathy<sup>1,2</sup>, and Karen Guillemin<sup>1,3</sup>

5 <sup>1</sup>Institute of Molecular Biology, University of Oregon, Eugene, Oregon, United States of  
6 America

7 <sup>2</sup>Department of Physics and Materials Science Institute, University of Oregon, Eugene,  
8 Oregon, United States of America

9 <sup>3</sup>Humans and the Microbiome Program, Canadian Institute for Advanced Research, Toronto,  
10 Ontario M5G 1Z8, Canada

11 \*Correspondence: [twiles@uoregon.edu](mailto:twiles@uoregon.edu)

12 **ABSTRACT**

13 The capacity to associate symbiotic bacteria with vital aspects of plant and animal biology is  
14 outpacing our understanding of the mechanisms shaping these interactions. A major barrier to  
15 mechanistic studies is the paucity of tools for genetically manipulating wild and diverse  
16 bacterial isolates. Solving this problem is crucial to elucidating the cellular and molecular rules  
17 that govern symbiotic relationships and ultimately harnessing them for agricultural and  
18 biomedical applications. Therefore, we constructed a series of vectors that expedite genetic  
19 knock-in and knock-out procedures across a range of bacterial lineages. This was  
20 accomplished by developing strategies for domestication-free bacterial conjugation, designing  
21 plasmids with customizable features, and streamlining allelic exchange using visual markers of  
22 homologous recombination. These tools enabled a comparative study based on live imaging of  
23 diverse bacterial symbionts native to the zebrafish intestine, with which we discovered  
24 heterogeneous colonization patterns and a striking correlation between bacterial population  
25 biogeography and cellular behavior.

## 26 INTRODUCTION

27 High-throughput metagenomic sequencing has exposed the previously unseen diversity of  
28 symbiotic bacteria that live in close contact with plants and animals throughout the  
29 biosphere<sup>1,2</sup>. Associations are being made at breakneck speed between the membership and  
30 activity of resident bacteria and the health, development, and evolution of their hosts<sup>3-7</sup>.  
31 However, the cataloging of symbiotic relationships—whether mutualistic, commensal, or  
32 pathogenic—is vastly outpacing their cellular and molecular interrogation<sup>8,9</sup>. Elucidating the  
33 mechanisms by which symbiotic bacteria live and interact with each other and their hosts will  
34 inform how they can be harnessed for agricultural and biomedical applications<sup>2,10-12</sup>.

35 Characterizing the biology of symbiotic bacteria requires methods for precisely  
36 manipulating their genomes. For example, stable chromosomal insertion of genes encoding  
37 fluorescent proteins allows cellular behaviors and interactions to be directly observed within  
38 native host-associated environments<sup>13,14</sup>. Additionally, gene deletion and complementation  
39 studies are essential for rigorously dissecting the genetic pathways that control specific  
40 phenotypes<sup>15</sup>. Such knock-in and knock-out technologies have long been mainstays in  
41 microbiology labs working with entrenched model organisms like *E. coli*, but established  
42 genetic approaches are often inadequate for manipulating wild and novel species or strains<sup>16</sup>.  
43 This is largely because legacy protocols can involve cumbersome and outdated procedures  
44 that are difficult to use across lineages. Consequently, the in-depth study of most symbiotic  
45 bacteria remains out of reach.

46 A major bottleneck within the field of symbiosis research is that locating appropriate  
47 genetic tools and methods or developing them de novo are arduous and time-consuming  
48 tasks. This problem is especially burdensome for investigators aiming to manipulate multiple

49 bacterial lineages derived from complex communities. To overcome these barriers, we have  
50 employed the zebrafish intestinal microbiota as a source of wild and diverse symbiotic  
51 bacteria<sup>17</sup>—which includes representatives of the *Vibrio*, *Aeromonas*, *Pseudomonas*,  
52 *Acinetobacter*, *Enterobacter*, and *Plesiomonas* genera—to develop and test streamlined tools  
53 and methods for bacterial genetic manipulation. We identified three main deficiencies inherent  
54 to current genetic approaches that if resolved, will immediately improve the genetic tractability  
55 of many bacteria. First, although conjugation is a robust and reliable method for delivering  
56 DNA into bacteria, strategies for selecting individual cells carrying the transferred DNA are not  
57 broadly compatible between different lineages and sometimes rely on deleterious  
58 domestication steps. Second, most vectors used for making genetic manipulations are not  
59 readily customized, which restricts their versatility and prevents further innovation. And third,  
60 techniques for generating chromosomal modifications via allelic exchange often depend on  
61 specific selection conditions that can vary between bacterial lineages and are difficult to  
62 troubleshoot when they fail. To address these shortcomings, we rationally designed a  
63 centralized set of genetic engineering vectors with new and updated functionalities. For DNA  
64 delivery, we developed alternative schemes for post-conjugation counterselection that avoid  
65 initial domestication of engineered bacteria, thereby preserving their natural physiology and  
66 behavior. For customization, we designed gene expression scaffolds with interchangeable  
67 sequence elements that can be tailored to different bacterial genomes, and with these  
68 produced a variety of ready-made vectors for fluorescently tagging bacteria. Moreover, an  
69 extensive collection of marked zebrafish intestinal symbionts was generated during this work  
70 that will accelerate research in the growing zebrafish–microbiota community. Lastly, we

71 devised a means of visually following homologous recombination events during allelic  
72 exchange protocols for more tractable generation of markerless chromosomal alterations.

73 To demonstrate the potential of these modernized tools to uncover new aspects of  
74 host–microbe interactions, we examined the colonization patterns of several bacterial  
75 symbionts native to the larval zebrafish intestine by light sheet fluorescence microscopy<sup>18</sup>. The  
76 intestinal microbiota is an especially important target for exploration because of its impact on  
77 host health and disease; however, its phylogenetic diversity and concealed location make it  
78 difficult to investigate in situ by conventional techniques. Unexpectedly, live imaging of  
79 bacterial symbiont behavior within larval zebrafish revealed that genome sequences and in  
80 vitro-based phenotypes were poor predictors of whether a given bacterium exhibits free-  
81 swimming motility in vivo. Most strikingly, we also discovered a general relationship between  
82 the growth mode of individual bacteria and their overall biogeography; namely, the average  
83 location of a population along the intestinal tract is strongly correlated with the fraction of  
84 planktonic cells it contains. In addition to revealing the existence of previously undocumented  
85 interactions within a vertebrate intestine, this exploratory experiment underscores how tools for  
86 genetically manipulating diverse bacterial symbionts facilitates comparative studies involving  
87 multiple species.

88 In total, the tools and step by step protocols described here will empower a wide range  
89 of researchers studying different host–microbe systems as well as free-living bacteria to  
90 explore deeper into the inner workings of wild and novel bacterial isolates. Our solutions  
91 equally enhance the genetic manipulation of both established and newly emerging model  
92 bacterial lineages and will speed the research pipeline from metagenomics to mechanistic  
93 microbiology.

94

## 95 **RESULTS**

### 96 ***The lack of compatible post-conjugation counterselection strategies and the deleterious*** 97 ***nature of bacterial domestication***

98 The process of genetically manipulating a bacterium typically begins with the delivery of  
99 recombinant DNA into its cell. Several methods can be used for this purpose, but conjugation  
100 or bacterial mating—which is the transfer of DNA from a donor cell to a target cell—is highly  
101 efficient and versatile, working with a wide range of bacterial lineages. During this procedure,  
102 successfully modified target cells are made drug resistant to facilitate their selective recovery.  
103 However, a constraint of conjugation is that it also depends on a strategy for simultaneously  
104 counterselecting against the donor cells that harbor the same drug resistance. This can be  
105 problematic when dealing with novel and uncharacterized bacteria because counterselection  
106 schemes often rely on known aspects of a target strain’s physiology. For example, many donor  
107 strains (e.g., *E. coli* SM10) are auxotrophic for amino acids and vitamins and thus, can be  
108 counterselected on defined growth media lacking specific metabolites. But for this approach to  
109 work the target strain cannot itself be auxotrophic and the right mixture of nutrients and ions  
110 must be formulated, which is not always straightforward due to the complex metabolic needs of  
111 different bacteria. We found that this drawback represents an immediate hurdle when working  
112 with several zebrafish-derived bacterial symbionts. None of the isolates we aimed to  
113 genetically manipulate could grow on a standardized defined growth medium (i.e., M9 minimal  
114 media) that is used for *E. coli* SM10 counterselection. This ultimately meant that customized  
115 counterselection media would need to be painstakingly developed for each new target strain.

116 Faced with this scenario, we turned to domestication, which is the process of modifying  
117 target strains with a selective trait that is not expressed by the donor. This is commonly done

118 by isolating target strain variants with spontaneous antibiotic resistance. However, despite the  
119 wide use of this technique, antibiotic resistances associated with domestication (e.g., to  
120 rifampicin or streptomycin) typically arise because of mutations within critical cellular  
121 machinery, such as RNA polymerase or components of the ribosome, which can severely  
122 impair the natural physiology of bacteria and render them unsuitable for study<sup>19–25</sup>. Consistent  
123 with the deleterious consequences of domestication, we found that a rifampicin-resistant  
124 variant of the zebrafish intestinal symbiont *Vibrio cholerae* ZWU0020, denoted ZWU0020R,  
125 exhibits highly perturbed growth kinetics in vitro (Figure 1A). In addition, although  
126 domestication of *Vibrio* ZWU0020 did allow us to successfully insert a gene encoding green  
127 fluorescent protein (GFP) within its genome, this modification further aggravated its poor  
128 growth phenotype (Figure 1A). As another assessment of ZWU0020R's altered physiology, we  
129 characterized its motility phenotype and observed that it displays attenuated swimming in soft  
130 agar compared to wild-type (Figure 1B). To determine if altered swimming is a phenotype of all  
131 rifampicin-resistant *Vibrio* ZWU0020 variants, we inspected the motility phenotype of four  
132 independently derived clones. Interestingly, two of the clones are attenuated like the original  
133 ZWU0020R strain, whereas the other two perform similar to wild-type, suggesting that they  
134 may carry alternative and/or compensatory mutations (Figure 1C). Altogether, our experience  
135 attempting to genetically manipulate a variety of novel zebrafish bacterial symbionts using  
136 conventional approaches highlights the limitations of current counterselection strategies and  
137 the deleterious nature of domestication.

138

139

## Figure 1

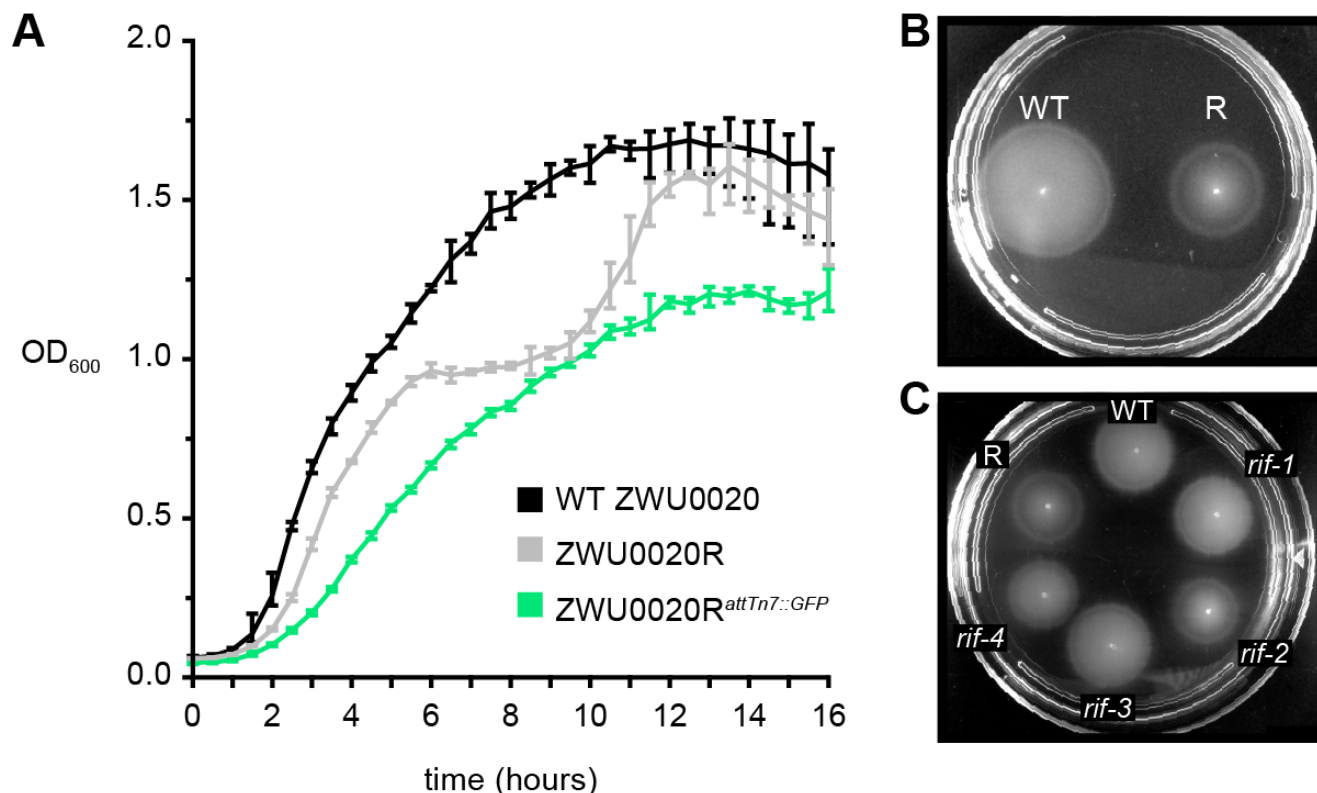

140

141 **Figure 1.** Domestication results in physiological defects. (A) Plotted is the average optical  
142 density at 600nm (OD<sub>600</sub>) vs. time (hours) of wild-type (WT) *Vibrio* ZWU0020, and its  
143 rifampicin-domesticated derivatives ZWU0020R and ZWU0020R<sup>attTn7::GFP</sup>, during shaking  
144 growth in LB broth at 30°C. Range bars are based on four technical replicates. (B) Swim  
145 motility of WT and ZWU0020R (R) in 0.2% tryptic soy agar at 30°C. (C) Swim motility of four  
146 rifampicin-resistant (*rif*) *Vibrio* ZWU0020 variants compared to WT and ZWU0020R performed  
147 as in B.

148

149

150 **Temperature and kill switch-based systems for domestication-free counterselection of**  
151 **donor cells.**

152 To address the lack of adequate post-conjugation counterselection methods, we set out to  
153 develop strategies that are technically straightforward and not reliant on inherent or  
154 domesticated traits of target strains. We devised two plasmid-based counterselection systems



155 that control donor cell growth by a mechanism similar to that of common suicide vectors. The  
156 first system is temperature-based and works through a temperature-sensitive origin of  
157 replication that restricts donor cell growth in the presence of antibiotic selection at or above  
158 37°C. Temperature-based control of plasmid replication is well established, but has not been  
159 widely implemented as a method of post-conjugation counterselection despite its amenability  
160 and previous indications that it can be used in this way<sup>26</sup>. The second system restricts donor  
161 cell growth through a genetic kill switch that, when induced, leads to the expression of three  
162 toxic peptides. These two approaches differ in their mode of action and offer slightly different  
163 procedural advantages. Notably, we chose to develop plasmid-based counterselection  
164 systems because their portability allows the use of alternative donor strains. To initially test the  
165 utility of each counterselection system, we incorporated them into existing vectors that are  
166 commonly used for making targeted Tn7 transposon-based chromosomal insertions<sup>27</sup>.

167 Temperature-based counterselection was achieved by replacing the R6K origin of  
168 replication of the Tn7-tagging vector pUC18R6KT-mini-Tn7T-GM (pTW56) with the  
169 temperature-sensitive origin of replication *ori<sub>101</sub>/repA101<sup>ts</sup>*<sup>28</sup> (Figure 2A). The resulting vector,  
170 pTn7xTS (**T**emperature-**S**ensitive), mediates temperature-dependent growth of *E. coli* SM10  
171 (Figure 2-Figure Supplement 1). At the permissive temperature of 30°C, SM10/pTn7xTS grows  
172 normally on rich media in the presence of antibiotic selection. At the restrictive temperature of  
173 37°C, the vector is unable to be maintained, leading to loss of antibiotic resistance and a drop  
174 in viability by up to three orders of magnitude (Figure 2-Figure Supplement 1). In the context of  
175 an example Tn7-tagging protocol, conjugation is performed at 30°C without antibiotic selection  
176 between two SM10 donor strains and a *Vibrio* target strain (Figure 2B, left). The SM10 donors  
177 carry either pTn7xTS (donor<sup>Tn</sup>) or the transposase-encoding helper plasmid pTNS2

178 (donor<sup>helper</sup>). At this point in the procedure, only the donor<sup>Tn</sup> strain is resistant to the selective  
179 antibiotic being used, which in this scenario is gentamicin. Successfully modified *Vibrio* cells  
180 harboring a chromosomal copy of the Tn7 transposon, along with the gentamicin resistance  
181 gene it encodes, are then selected for by plating the mating mixture in the presence of  
182 gentamicin at 37°C (Figure 2B, right). The donor<sup>Tn</sup> strain is counterselected because it is  
183 unable to maintain plasmid-based resistance at 37°C, whereas the donor<sup>helper</sup> strain remains  
184 sensitive to gentamicin throughout the procedure.

185 A strength of temperature-based counterselection is that it is technically simple,  
186 requiring only a shift in growth temperature, but it is limited to target strains that can grow at  
187 37°C. This constraint is problematic for several bacterial lineages native to zebrafish as well as  
188 other ectotherms, such as stickleback or fruit flies, which cannot survive at temperatures above  
189 the growth temperature of their host (in these cases,  $\leq 30^\circ\text{C}$ ). Therefore, we developed a  
190 second strategy based on an inducible kill switch that functions independently of growth  
191 temperature.

192 The kill switch we designed consists of two elements: a constitutively expressed *lacI*  
193 gene, which encodes the lac repressor, and a synthetic operon containing three *E. coli*-derived  
194 genes encoding toxic peptides—HokB, GhoT, and TisB—placed under the control of the LacI-  
195 repressible promoter P<sub>tac</sub> (Figure 2-Figure Supplement 2A)<sup>29–33</sup>. Upon induction by the  
196 allolactose analogue isopropyl- $\beta$ -D-thiogalactoside (IPTG) these toxic peptides act to disrupt  
197 the proton-motive force within donor cells, leading to impaired ATP synthesis and death. We  
198 built this kill switch counterselection system into the backbone of the Tn7-tagging vector  
199 pUC18T-mini-Tn7T-GM (pTW54), producing pTn7xKS (**K**ill **S**witch) (Figure 2C). In the  
200 presence of antibiotic selection and IPTG, pTn7xKS is capable of inhibiting SM10 growth by up

201 to four orders of magnitude (Figure 2-Figure Supplement 2B). Of note, initial kill switch  
 202 prototypes carrying only a single toxin gene were less potent, which may be an important  
 203 consideration in future kill switch designs (Figure 2-Figure Supplement 2B). In the context of a  
 204 Tn7-tagging scenario, kill switch-based counterselection is carried out in much the same way  
 205 as temperature-based counterselection, except that selection of modified target cells is done  
 206 on media containing IPTG at a growth temperature suitable for the target strain being used  
 207 (Figure 2D).

## Figure 2

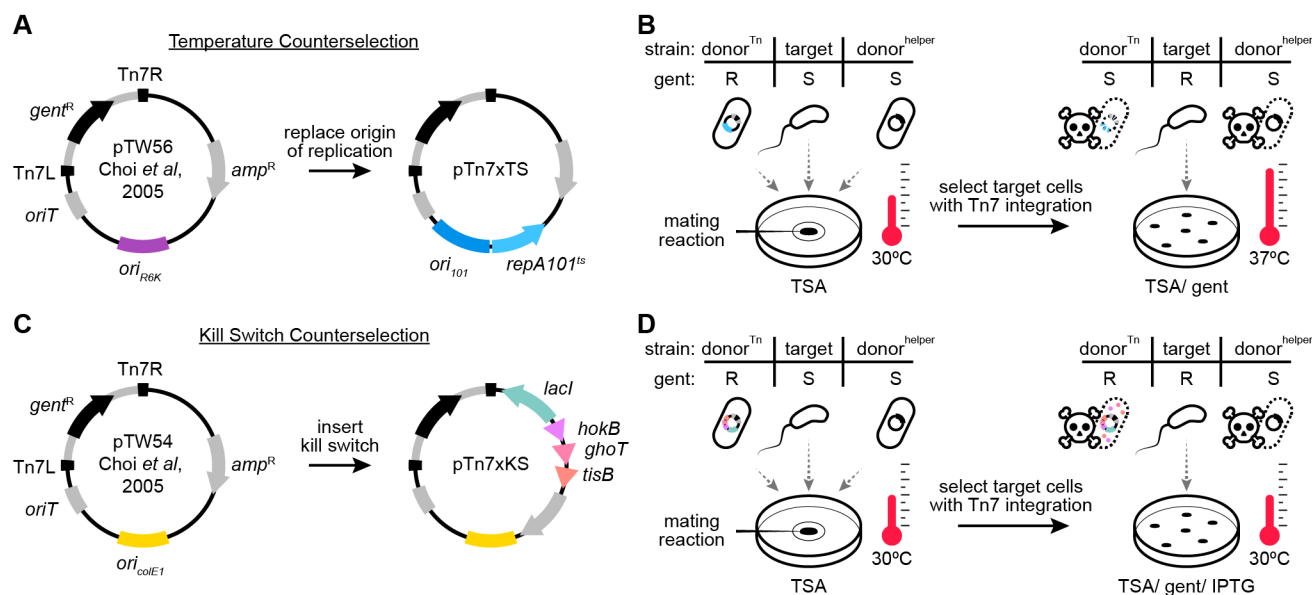

210

211 **Figure 2.** Construction and application of domestication-free counterselection systems. **(A)**  
 212 Temperature-based counterselection was achieved by replacing the R6K origin of replication  
 213 (*ori<sub>R6K</sub>*) of pUC18R6KT-mini-Tn7T-GM (pTW56) with the temperature-sensitive origin of  
 214 replication *ori<sub>101</sub>/repA101<sup>ts</sup>*. Tn7L and Tn7R inverted repeats flank the Tn7 transposon (gray  
 215 stroke). *gent<sup>R</sup>*, gentamicin resistance gene; *amp<sup>R</sup>*, ampicillin resistance gene; *oriT*, origin of  
 216 transfer. **(B)** Left: triparental conjugation between SM10 donor strains carrying either a  
 217 temperature-sensitive Tn7-tagging vector (donor<sup>Tn</sup>) or transposase helper vector (donor<sup>helper</sup>)  
 218 and a *Vibrio* target strain. Gentamicin (gent) phenotype of each strain is indicated as resistant  
 219 (R) or sensitive (S). Mating reactions are incubated at 30°C upon a filter disc on a tryptic soy

220 agar (TSA) plate. Right: post-conjugation counterselection of donor cells is done on TSA/ gent  
221 plates at 37°C. **(C)** Kill switch-based counterselection was achieved by inserting a LacI-  
222 regulated toxin array, comprised of the genes *hokB*, *ghoT*, and *tisB*, into the backbone of  
223 pUC18T-mini-Tn7T-GM (pTW54). *ori<sub>ColE1</sub>*, high copy number origin of replication. **(D)** Left:  
224 triparental conjugation as in **B**, except donor<sup>Tn</sup> carries a kill switch Tn7-tagging vector. Right:  
225 post-conjugation counterselection of donor cells is done on TSA/ gent/ IPTG plates at 30°C.

---

227

228 ***Chromosomal insertion of rationally designed gene expression scaffolds into wild and***  
229 ***uncharacterized bacterial lineages using domestication-free counterselection systems.***

230 To test the effectiveness of our domestication-free counterselection systems, we employed  
231 them to integrate genetically encoded fluorescent proteins into the chromosome of various  
232 uncharacterized zebrafish bacterial symbionts. However, while exploring available gene  
233 expression constructs, we found that many are inflexible and inadequately designed.  
234 Specifically, vectors often contain extraneous DNA sequences left over from previous  
235 imprecise subcloning procedures and have little to no options for customizing important  
236 sequence motifs. The ability to customize expression constructs is critical when working with  
237 lineages that differ in, for instance, optimal promoter sequences or ribosome binding sites.  
238 Therefore, we first addressed the need for standardized expression constructs by rationally  
239 designing a modular gene expression scaffold.

240 An expression scaffold containing four interchangeable elements—a promoter, 5' and 3'  
241 untranslated regions (UTR), and an open reading frame (ORF)—was built into the multiple  
242 cloning site (mcs) of pGEN-mcs<sup>34</sup>, producing pXS (e**X**pression **S**caffold) (Figure 3). pGEN-mcs  
243 was chosen to house the expression scaffold because it enables fast and easy prototyping of  
244 scaffold parts in *E. coli*, which like many zebrafish bacterial symbionts, is a member of the  
245 Gammaproteobacteria and shares basic genetic control elements. Restriction sites underlie

246 the modular architecture of the scaffold and allow each part to be customized (Figure 3-Figure  
247 Supplement 1A). Sequence motifs can be replaced individually or the entire scaffold can be  
248 subcloned. As initially built, a minimal  $P_{tac}$  promoter without the lac operator sequence, which  
249 avoids interference from an endogenously encoded lac repressor if present, is used to achieve  
250 constitutive transcription. A synthetic 5' UTR containing both an epsilon enhancer sequence  
251 and ribosome binding site controls translation<sup>35,36</sup>. The 3' UTR, which was originally present  
252 within pGEN-mcs, contains a *trpL* attenuator sequence for transcriptional termination<sup>37</sup>. Lastly,  
253 three different ORFs encoding the fluorescent proteins sfGFP<sup>38</sup>, dTomato<sup>39</sup>, and mPlum<sup>40</sup> were  
254 each used to produce three separate expression scaffold variants, pXS-sfGFP, pXS-dTomato,  
255 and pXS-mPlum (Figure 3-Figure Supplement 1A). After assembly, each expression scaffold  
256 was subcloned into Tn7-tagging vectors with either temperature (i.e., pTn7xTS) or kill switch  
257 (i.e., pTn7xKS) counterselection systems (Figure 3-Figure Supplement 1B and C).

258 Tn7-tagging vectors equipped with rationally designed expression scaffolds were next  
259 used to carry out chromosomal tagging of *Vibrio* ZWU0020 as outlined in Figure 2B and 2D.  
260 Unlike previous attempts (Figure 1A), domestication-free manipulation of *Vibrio* ZWU0020—  
261 using either temperature or kill switch counterselection systems—both worked and preserved  
262 this strain's normal physiology (Figure 3-Figure Supplement 2). To demonstrate the  
263 compatibility of these tools across different zebrafish symbiont lineages, we tagged 10 strains  
264 representing 6 different genera—including *Vibrio*, *Aeromonas*, *Pseudomonas*, *Acinetobacter*,  
265 *Enterobacter*, and *Plesiomonas* (Supplementary File 1). Multiple variants that express either  
266 *sfGFP*, *dTomato*, or *mPlum* were generated for many of the lineages (Supplementary File 1).  
267 This collection of marked zebrafish symbionts serves as a resource of ready-made strains for  
268 the zebrafish microbiota community. Notably, several of the lineages manipulated are novel

269 and have yet to be assigned species designations, which is typical of symbionts associated  
270 with complex host-associated communities. We also verified that domestication-free  
271 counterselection systems can be used to manipulate other species not associated with the  
272 zebrafish intestinal microbiota, including a human-derived strain of *E. coli* (HS)<sup>41</sup>, the leech  
273 symbiont *Aeromonas veronii* HM21<sup>42</sup>, and an environmental isolate of *Shewanella oneidensis*  
274 (MR-1)<sup>43</sup> (Supplementary File 1).

275

276

### Figure 3

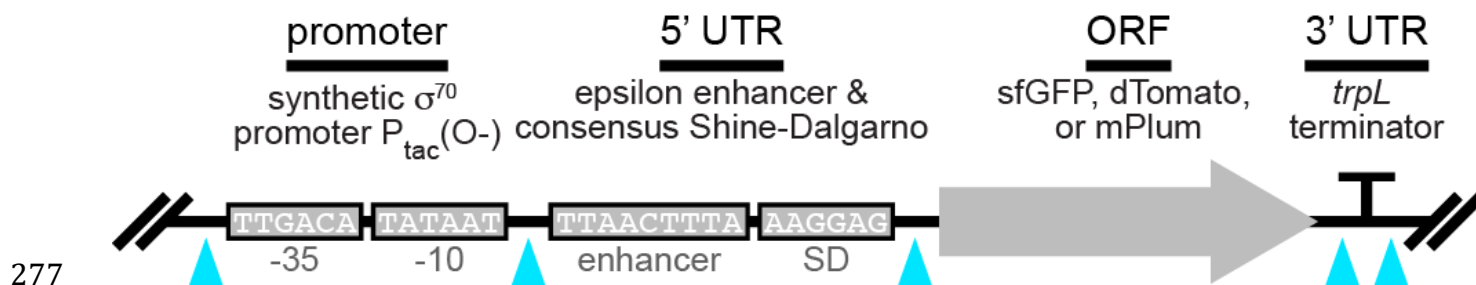

278 **Figure 3.** Gene expression scaffold design features. Each interchangeable element is flanked  
279 by restriction sites (cyan arrowheads). Promoter: constitutively active P<sub>tac</sub> promoter without lac  
280 operator sequence (O-) drives transcription. 5' untranslated region (UTR): epsilon enhancer  
281 sequence and consensus ribosome binding site (i.e., Shine-Dalgarno sequence) promote  
282 strong translation. Open reading frame (ORF): encodes a single fluorescent protein. 3' UTR:  
283 *trpL* attenuator sequence terminates transcription.

284

285

### 286 ***Streamlining allelic exchange by visualizing homologous recombination events using a*** 287 ***fluorescent tracker***

288 Allelic exchange is a robust and versatile homologous recombination technique for making  
289 targeted genetic knock-ins and knock-outs in bacteria<sup>44-46</sup>. Therefore, to extend the utility of  
290 our domestication-free counterselection systems, we incorporated them into currently available

291 vectors that are used for mediating allelic exchange. As expected, these updates facilitated the  
292 domestication-free engineering of gene deletions in several uncharacterized symbiotic  
293 bacteria. However, not all bacteria tested could be successfully manipulated using current  
294 allelic exchange protocols, highlighting another breakdown in the compatibility.

295 Allelic exchange involves two successive homologous recombination events between  
296 an allelic exchange vector and the bacterial chromosome. The crux of allelic exchange is  
297 isolating rare unmarked mutant cells from large populations of heterozygous intermediates  
298 known as merodiploids that arise after the vector integrates into the chromosome during the  
299 first recombination step. A longstanding strategy for recovering variants that have undergone  
300 the second recombination, which results in vector loss, works by restricting merodiploid  
301 growth. This is typically done by expressing a gene called *sacB* located within the allelic  
302 exchange vector backbone that confers growth inhibition in the presence of sucrose<sup>47</sup>.  
303 Although widely used, *sacB* counterselection of merodiploids does not always work and can be  
304 difficult to troubleshoot when it fails. We experienced these shortcomings while attempting to  
305 delete a gene associated with chemotactic behavior in a zebrafish symbiont, *Vibrio furnissii*  
306 ZOR0035, using the common *sacB*-based allelic exchange vector pDMS197<sup>48</sup>. *Vibrio*  
307 ZOR0035 merodiploids are refractory to *sacB* counterselection, which made it impossible to  
308 isolate cells with the desired mutation. We surmise that the counterselection fails in some  
309 bacterial lineages because the expression or activity of the levansucrase enzyme encoded by  
310 *sacB*, which synthesizes high-molecular-weight fructose polymers, is inadequate. To overcome  
311 lineage-specific limitations of *sacB* counterselection, we developed a more tractable strategy  
312 based on visual markers.

313 Our solution uses GFP to track the merodiploid status of target cells (Figure 4A). In this  
314 way, the initial recombination step generates GFP-positive merodiploid populations that can be  
315 readily screened for cells where the second recombination step has occurred, producing GFP-  
316 negative mutants (i.e., instances of “successful” allelic exchange), which typically occur with  
317 equal frequency as wild-type revertants (i.e., instances of “aborted” allelic exchange) (Figure  
318 4A). To test the feasibility of this approach, we revisited the engineering of a gene deletion in  
319 *Vibrio* ZOR0035. A constitutively expressed GFP gene was inserted into the backbone of a  
320 prototype pDMS197 vector containing a kill switch counterselection system and an allelic  
321 exchange cassette targeting the chemotaxis gene *cheA*. At the time of this work, *cheA* was the  
322 focus of an unrelated project, and it is used here merely to demonstrate proof of concept. As  
323 outlined in Figure 4B, the GFP marked allelic exchange vector was delivered into *Vibrio*  
324 ZOR0035 via conjugation. GFP-positive merodiploids, harboring an integrated copy of the  
325 allelic exchange vector, were readily isolated and purified. Of note, over the course of this work  
326 we empirically determined that the kill switch toxins do not interfere with merodiploid growth in  
327 several different bacteria, indicating that either they have restricted activity and are only lethal  
328 to *E. coli* donor cells or they fail to reach toxic levels when expressed from a single  
329 chromosomal locus. Next, populations of merodiploids were expanded in liquid culture and  
330 plated on nonselective media at a density that allowed discrete colonies to form. Colonies  
331 exhibiting sectored regions of GFP loss were then purified to obtain isogenic clones, and  
332 putative mutants were genotyped by polymerase chain reaction (PCR). Genotyping was done  
333 using PCR primers that flank the *cheA* locus, yielding a single large amplification product if the  
334 *cheA* gene is present and a smaller sized product if the mutant allele is present. Because they  
335 are heterozygous, merodiploids produce both products. Ultimately, our visual merodiploid



336 tracking strategy proved extremely efficient and straightforward to perform, allowing us to  
 337 successfully engineer a targeted gene deletion in a bacterial strain that was otherwise  
 338 genetically intractable using previous methodologies.

339

340

## Figure 4

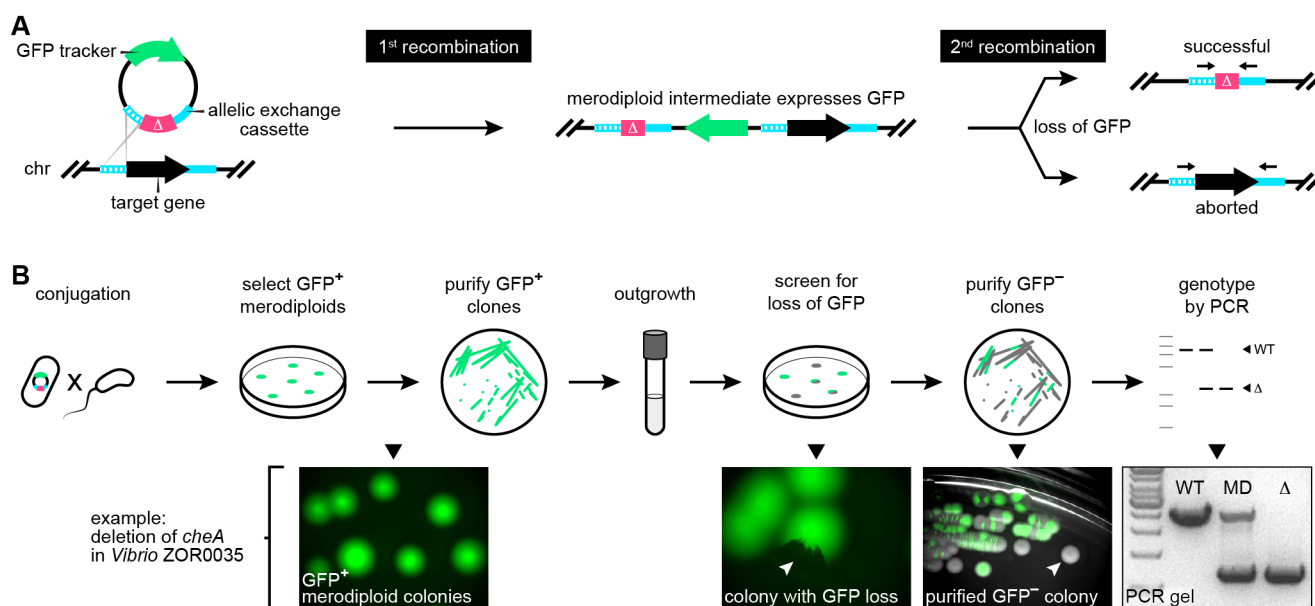

341

342 **Figure 4.** Performing allelic exchange with a fluorescent merodiploid tracker. (A) Outline of  
 343 recombination events during allelic exchange with a fluorescent tracker. Depicted is an allelic  
 344 exchange vector that expresses GFP and carries a cassette comprised of a mutant allele ( $\Delta$ ,  
 345 magenta) flanked by regions (hashed and solid cyan strokes) homologous to regions flanking a  
 346 target gene located on the bacterial chromosome (chr). The first recombination event—which  
 347 randomly occurs between either homology region—integrates the vector into the chromosome,  
 348 producing a GFP-expressing merodiploid. The second recombination event results in GFP  
 349 loss. If it occurs between the unused homology region (i.e., the “solid” region in this scenario),  
 350 then allelic exchange is successful. If it occurs between the same region (i.e., the “hashed”  
 351 region), the original wild-type locus is restored. Black arrows above final allelic exchange  
 352 products denote primer annealing sites for PCR-based genotyping depicted in B. (B) Top row  
 353 illustrates the procedural steps of allelic exchange using a fluorescent merodiploid tracker.  
 354 Bottom row shows example images acquired during the engineering of a gene deletion in  
 355 *Vibrio ZOR0035*. White arrowheads indicate colonies with partial or complete loss of GFP  
 356 expression. WT, wild-type *Vibrio ZOR0035*; MD, merodiploid;  $\Delta$ ,  $\Delta$ *cheA* mutant.

357

358 ***Gene deletion and complementation with modernized engineering vectors***

359 To complete the genetic toolkit for manipulating wild and diverse bacterial isolates, we  
360 combined the tools and approaches described thus far to construct a set of adaptable allelic  
361 exchange vectors that further improve the tractability of making markerless genetic alterations.  
362 These modernized vectors incorporate fluorescent merodiploid tracking and domestication-free  
363 counterselection systems within a highly customizable plasmid architecture (Figure 5, “vector  
364 design”). Molecular scaffolds for holding antibiotic selection markers, fluorescent trackers, and  
365 a counterselection kill switch were built into a pUC-derived vector backbone that has a  
366 temperature-sensitive origin of replication and a single blunt restriction site for straightforward  
367 insertion of allelic exchange cassettes. This modular design allows virtually every functional  
368 element to be customized for different bacterial lineages (Figure 5-Figure Supplement 1).

369 In total, two allelic exchange vectors were generated, pAX1 and pAX2 (**A**llelic  
370 **e**Xchange), which differ in their domestication-free counterselection systems (Figure 5). Both  
371 vectors mediate temperature-based counterselection of SM10 donor cells, but pAX2 also  
372 contains a TetR-regulated kill switch that can be induced by anhydrotetracycline (Figure 5-  
373 Figure Supplement 2). Notably, the dual temperature/kill switch counterselection activity of  
374 pAX2 is quite potent, reducing SM10 viability by over five orders of magnitude (Figure 5-Figure  
375 Supplement 2B). Two resistance markers for gentamicin and chloramphenicol were included to  
376 give pAX1 and pAX2 greater “off the shelf” compatibility with different target strains.

377

378

## Figure 5

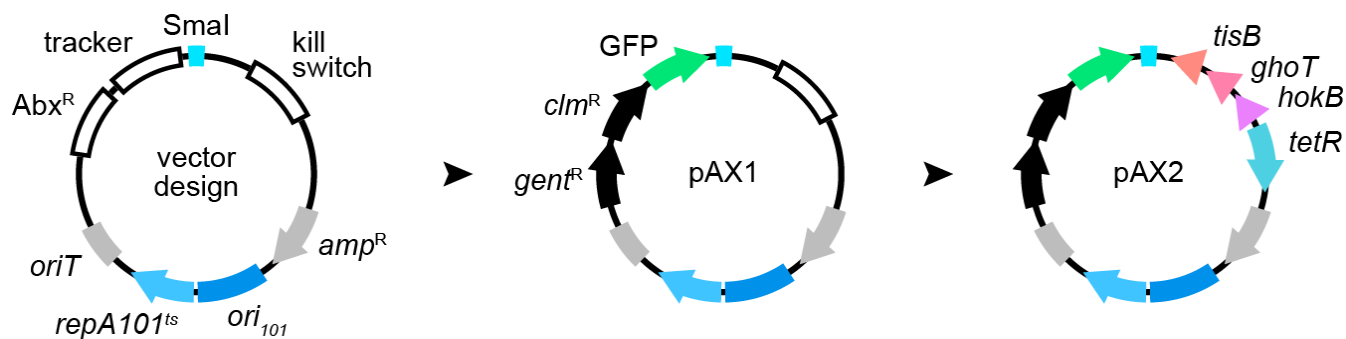

379

380 **Figure 5.** Rational design of customizable allelic exchange vectors. “vector design” illustrates  
381 vector architecture. Features include customizable molecular scaffolds for holding antibiotic  
382 selection markers ( $Abx^R$ ), a merodiploid tracker, a single *SmaI* restriction site for insertion of  
383 allelic exchange cassettes, and an option for kill switch-based counterselection of donor cells.  
384 *pAX1* was initially constructed, and carries two antibiotic selection markers encoding  
385 resistance to gentamicin ( $gent^R$ ) and chloramphenicol ( $clm^R$ ) along with a GFP tracker. *pAX2*  
386 was derived via the insertion of a tet-inducible kill switch. *oriT*, origin of transfer;  
387 *ori<sub>101</sub>/repA101<sup>ts</sup>*, temperature-sensitive origin of replication;  $amp^R$ , ampicillin resistance gene.

388

389

390 These new allelic exchange vectors were next used to engineer markerless gene  
391 deletions. For this proof of concept, we designed an allelic exchange cassette to delete two  
392 neighboring genes in *Vibrio* ZWU0020, *pomA* and *pomB*, which encode components of the  
393 polar flagellar motor. After inserting the cassette into an early, but functionally equivalent,  
394 version of *pAX1* (see Materials and Methods), GFP-positive merodiploids were generated and  
395 isolated as before and screened for loss of GFP expression and thus, the integrated vector  
396 (Figure 6-Figure Supplement 1). Mutants harboring the desired mutation, which fused the start  
397 codon of *pomA* with the stop codon of *pomB*, were confirmed by PCR (Figure 6A and 6B). As  
398 anticipated, ZWU0020  $\Delta pomAB$  exhibited complete loss of swimming motility in soft agar  
399 (Figure 6C, bottom left) without overt growth defects in liquid media (Figure 6-Figure

400 Supplement 1). To demonstrate the cross-lineage compatibility of these tools, we successfully  
401 employed pAX2 to create a similar markerless deletion of a homologous *pomAB* locus in  
402 another zebrafish symbiont, *Aeromonas veronii* ZOR0001 (Figure 6-Figure Supplement 2).  
403 Notably, while screening *Vibrio* ZWU0020 and *Aeromonas* ZOR0001 merodiploid colonies for  
404 putative mutants, we observed that many different patterns of GFP loss can arise (Figure 6-  
405 Figure Supplement 3). Remarkably, even in situations where mutant cells reside within  
406 miniscule GFP-negative patches, a single colony purification step can often be used to isolate  
407 them. The ability to readily identify and recover mutant cells with such sensitivity highlights the  
408 robustness of our visual screening approach.

409         Constructing deletion mutants is just the first step in dissecting the genetic pathways  
410 that underlie a given activity or behavior. Complementation must also be performed to  
411 rigorously confirm that a mutant phenotype is the result of a specific genetic disruption and not  
412 polar effects or other unintended consequences of chromosomal manipulation<sup>15</sup>. Therefore, we  
413 wanted to demonstrate how our domestication-free Tn7-tagging vectors could be employed to  
414 complement the ZWU0020  $\Delta pomAB$  mutant. The *pomAB* locus of ZWU0020, including the  
415 native *pomA* promoter, was PCR-amplified and inserted within the Tn7 transposon of the  
416 tagging vector pTn7xTS-sfGFP, which also contains a constitutively expressed *sfGFP* (Figure  
417 6D). Chromosomal insertion of this construct at the *attTn7* site of ZWU0020  $\Delta pomAB$  fully  
418 restores wild-type motility, thus confirming that sole disruption of these genes caused the loss  
419 of motility in the mutant (Figure 6C, bottom right).

420

421

## Figure 6

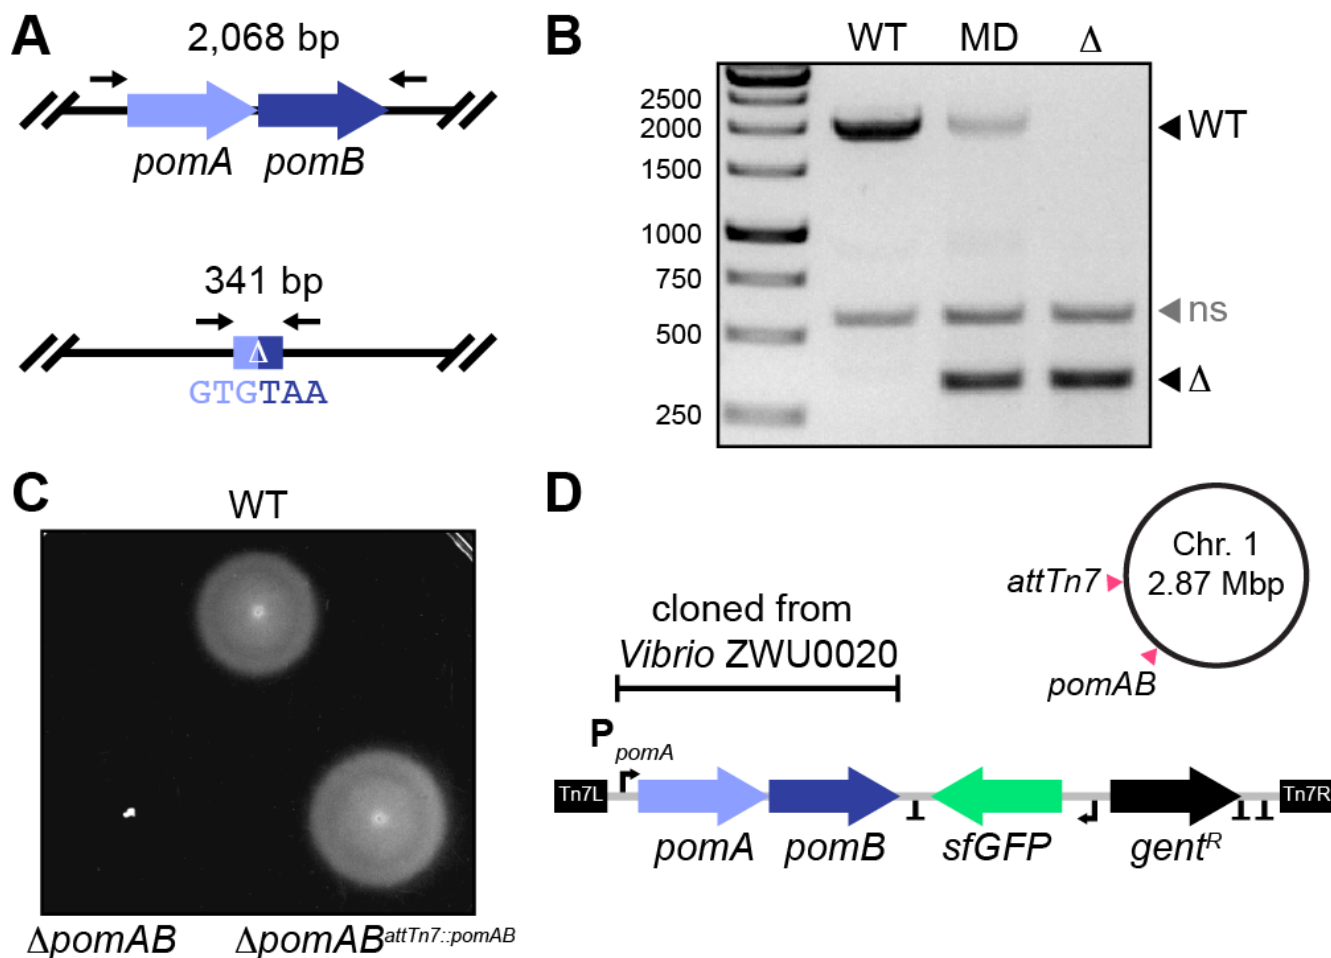

422

423 **Figure 6.** Gene deletion and complementation with modernized engineering vectors. (A) Top:  
 424 wild-type *pomAB* locus in *Vibrio* ZWU0020. Bottom: result of markerless *pomAB* deletion via  
 425 allelic exchange. Black arrows mark approximate primer annealing sites for genotyping and the  
 426 size of each amplification product is indicated. (B) Agarose gel showing PCR-based  
 427 genotyping of wild-type (WT), merodiploid (MD), and a  $\Delta pomAB$  ( $\Delta$ ) mutant. Migration  
 428 distances of WT and mutant alleles are indicated. ns, nonspecific amplification product. (C)  
 429 Swim motility of WT,  $\Delta pomAB$ , and the complemented  $\Delta pomAB^{attTn7::pomAB}$  variant in 0.2%  
 430 tryptic soy agar at 30°C. (D) Shown is a schematic of the Tn7 transposon from pTn7xTS-  
 431 sfGFP used for complementation, which was modified to carry the native *pomAB* locus of  
 432 *Vibrio* ZWU0020. Also depicted are the relative positions of where the *pomAB* genes were  
 433 deleted and reintroduced at the Tn7 insertion site (*attTn7*) on chromosome 1 of *Vibrio*  
 434 ZWU0020. “T” denotes transcriptional terminators; Tn7L and Tn7R, Tn7 inverted repeats,  
 435 P<sub>*pomA*</sub>, native *pomA* promoter; *gent<sup>R</sup>*, gentamicin resistance gene; sfGFP, fluorescent tag.  
 436

437 ***Live imaging of diverse bacterial symbionts yields insights into host–microbe***  
438 ***interactions within the vertebrate intestine.***

439 The power to genetically manipulate a diverse range of bacterial symbionts provides an  
440 opportunity for comparative studies focused on identifying unique or broadly conserved  
441 features of host–microbe interactions. To illustrate how the tools developed in this work  
442 facilitate such investigations, we examined the intestinal colonization patterns and cellular  
443 behaviors of seven fluorescently tagged zebrafish symbionts by light sheet fluorescence  
444 microscopy<sup>13,49</sup>. The strains chosen included: *Aeromonas* ZOR0001, *Aeromonas* ZOR0002,  
445 *Enterobacter* ZOR0014, *Plesiomonas* ZOR0011, *Pseudomonas* ZWU0006, *Vibrio* ZOR0036,  
446 and *Vibrio* ZWU0020. A tagged version of the ZWU0020  $\Delta pomAB$  motility mutant was also  
447 analyzed. Prior to imaging, bacteria were associated individually with 4-day old, germ-free  
448 larval zebrafish for 24 hours. Mono-association provides unrestricted access to the intestinal  
449 environment free of competition with resident microbiota, and therefore allows interactions  
450 between a single symbiont and its host to be studied in isolation. For each strain, real-time  
451 two-dimensional movies and three-dimensional images spanning the entire volume of the  
452 larval intestine were acquired from three separate hosts (Figure 7, Figure 7-Figure Supplement  
453 1, and Supplementary Movies 1–8). From these data, distinct population structures are readily  
454 identified, and can be summarized by three properties: cell motility, growth mode (i.e.,  
455 planktonic vs aggregated), and biogeography. Additional features of each strain, including  
456 estimated abundance, are provided in Figure 7-Figure Supplement 2.

457

458

## Figure 7

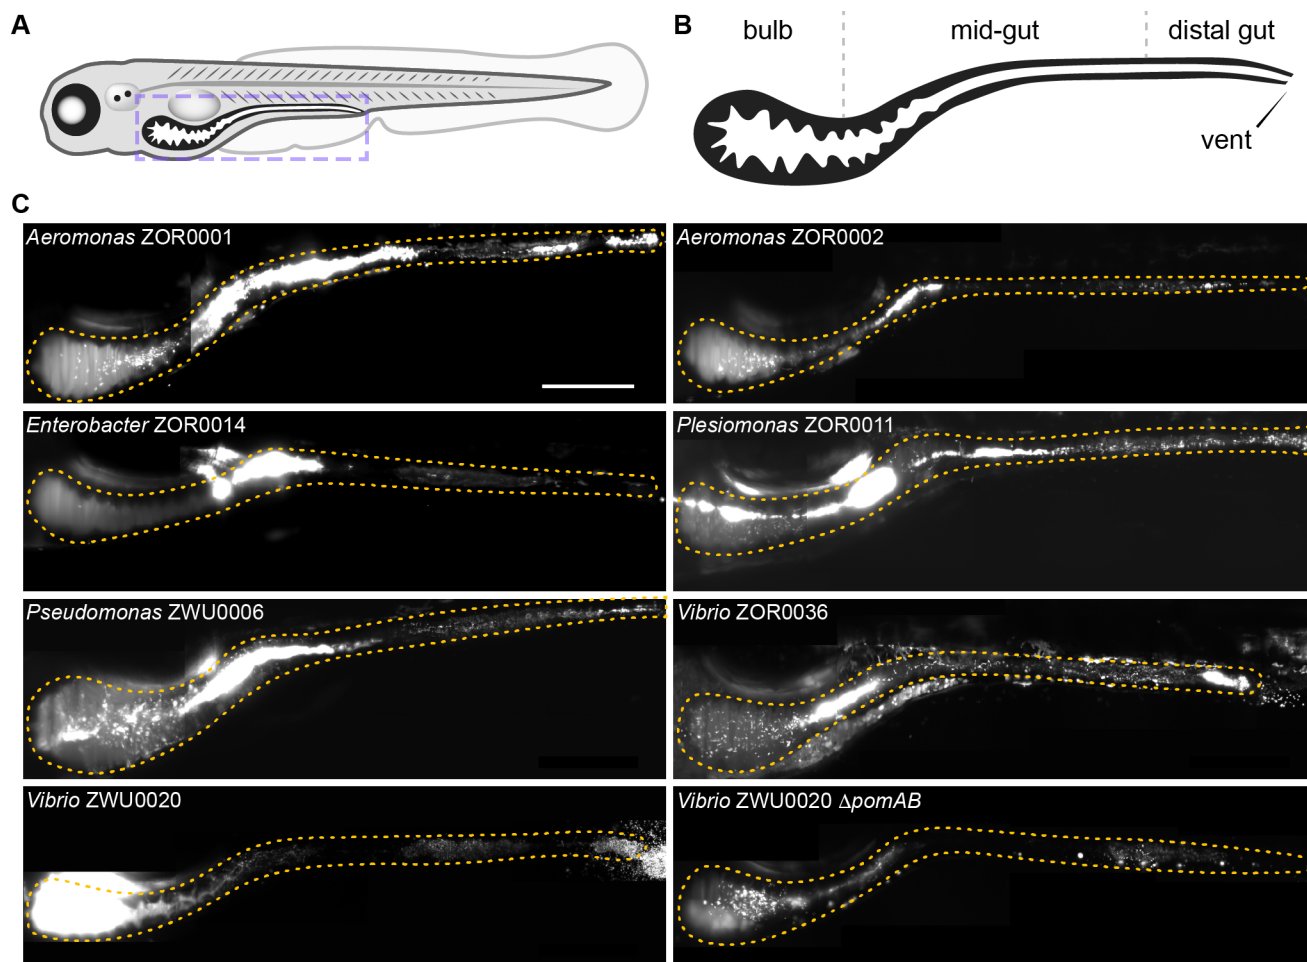

459

460 **Figure 7.** Intestinal colonization patterns and growth modes of zebrafish symbionts. (A)  
461 Cartoon diagram of a 5-day old larval zebrafish. Purple dashed box outlines region imaged in  
462 C. (B) Diagram shows the boundaries of the bulb, mid-gut, and distal gut within the larval  
463 intestine. The estimated bulb to mid-gut boundary is located where the bulb begins to become  
464 patently narrow. The mid-gut to distal gut boundary is approximately located where intestinal  
465 epithelial cells begin transitioning to a more colonic epithelial cell type<sup>50</sup>. (C) Maximum intensity  
466 projections of 3D image stacks acquired by light sheet fluorescence microscopy for indicated  
467 bacterial strains. Orange dotted outline marks the intestine in each image. Scale bar: 200 $\mu$ m.

468

469

470 Four of the seven wild strains examined display active motility within the intestine.

471 Surprisingly, we found several discrepancies between the motility phenotype of strains in vivo

472 and their predicted capacity for motility based on phylogenetic relatedness, genome sequence,  
473 and performance during in vitro assays (Figure 7-Figure Supplement 3 and Supplementary  
474 Movies 1–7). Each strain carries genes for flagellum biogenesis and displays free-swimming  
475 motility in liquid media. In addition, all strains were found to swim in soft agar, with the  
476 exception of *Vibrio* ZOR0036 (Figure 7-Figure Supplement 4). Yet despite these attributes,  
477 motile individuals were not observed within intestinal populations of *Enterobacter* ZOR0014,  
478 *Aeromonas* ZOR0001, and *Aeromonas* ZOR0002 (Supplementary Movies 2–4). We note that  
479 in a previous live imaging study involving *Aeromonas* ZOR0001 motile cells were detected, but  
480 that their occurrence was incredibly rare<sup>13</sup>. In addition, although *Vibrio* ZOR0036 exhibits little  
481 motility in soft agar, it gives rise to a considerable number of highly motile cells in vivo  
482 (Supplementary Movie 5); however, its overall motility phenotype is muted compared to closely  
483 related *Vibrio* ZWU0020 (Figure 7-Figure Supplement 3 and 4, and Supplementary Movie 1).

484 The growth mode of cells is categorized as either planktonic, which includes both motile  
485 and non-motile individuals, or aggregated. Both modes are typically represented across  
486 different populations, but the ratio of cells in each mode tends to be strain-specific. For  
487 example, at one extreme, populations of *Vibrio* ZWU0020 are almost entirely comprised of  
488 highly motile planktonic cells; this is more apparent in movies than three-dimensional image  
489 scans because of this strain's high population density and fast movement (Supplementary  
490 Movie 1). At the opposite extreme, *Enterobacter* ZOR0014 forms large multicellular aggregates  
491 without motile individuals (Figure 7C and Supplementary Movie 2). The remaining strains  
492 produce populations with intermediate mixtures of planktonic and aggregated cells (Figure 7C  
493 and Figure 7-Figure Supplement 1).



494           Regarding biogeography, we observed a range of strain-specific spatial distributions  
495 along the length of the intestine. We can coarsely classify the location of bacterial populations  
496 as primarily residing in one of two regions, the proximal gut (referred to as the “bulb”) or the  
497 mid-gut, which we approximate in Figure 7B based on previous studies of larval zebrafish  
498 intestinal development<sup>50,51</sup>. For most strains, the bulk of their population is distributed  
499 throughout the mid-gut (e.g., *Aeromonas* ZOR0001, *Aeromonas* ZOR0002, *Enterobacter*  
500 ZOR0014, *Plesiomonas* ZOR0011, *Pseudomonas* ZWU0006, and *Vibrio* ZOR0036) (Figure  
501 7C). By contrast, populations of *Vibrio* ZWU0020 are located within the proximal portion of the  
502 bulb, consistent with previous findings (Figure 7C)<sup>13</sup>. Notably, compared to wild-type, the  
503 ZWU0020  $\Delta pomAB$  motility mutant exhibits a reduction in overall population size and a slight  
504 shift in distribution to an area between the bulb and mid-gut (Figure 7C), indicating that for this  
505 strain, motility controls abundance and biogeography.

506           To distill and quantify our observations, we devised scalar metrics of biogeography and  
507 growth mode using computational image analysis (Materials and Methods). For each  
508 population, we computed the center of mass along the anterior–posterior axis of the intestine  
509 to represent biogeography and enumerated the fraction of cells that exist as planktonic  
510 individuals to represent growth mode. Plotting these data against each other shows a striking  
511 and unanticipated relationship: the fraction of planktonic cells within a strain’s population is  
512 strongly correlated with its biogeography (Figure 8). We quantified this relationship by linear  
513 regression of log-transformed planktonic fraction and population center medians, excluding the  
514 ZWU0020  $\Delta pomAB$  motility mutant (Figure 8, dashed trend line;  $r^2 = 0.6762$ ). Remarkably, the  
515 ZWU0020  $\Delta pomAB$  motility mutant conforms to this trend (Figure 8). As expected, populations  
516 of ZWU0020  $\Delta pomAB$  contain no motile individuals, but unexpectedly they adopt a more

517 aggregated state compared to wild-type ZWU0020 (Supplementary Movie 8). This change in  
518 growth mode and the concomitant change in biogeography moves the ZWU0020 motility  
519 mutant along the trend line.

520

521

**Figure 8**

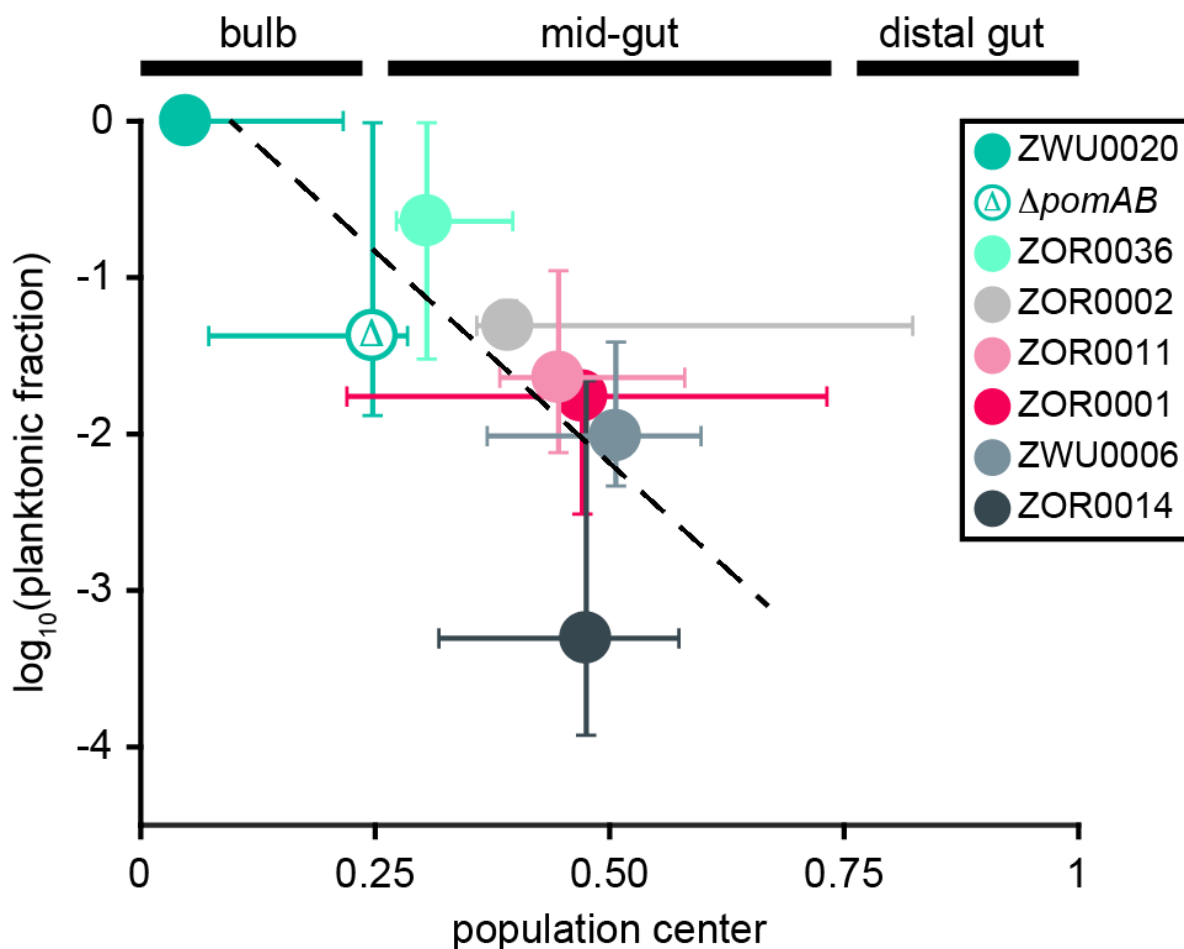

522

523 **Figure 8.** Relationship between growth mode and population biogeography. Plotted is the  
524 median log-transformed fraction of planktonic cells and median population 1D center of mass  
525 for each bacterial strain. Bars represent ranges. Data were derived from three animals (N = 3)  
526 per strain and are based on segmented 3D images from Figure 7 and Figure 7-Figure  
527 Supplement 1. Dashed trend line was generated by linear regression of median values (N = 7  
528 data points,  $r^2 = 0.6762$ ). Corresponding boundaries for the bulb, mid-gut, and distal gut are  
529 indicated above the plot by black bars.

530  
531

## 532 **DISCUSSION**

### 533 **Impact on Bacterial Symbioses Research**

534 Over the last decade, the landscape of bacterial symbiosis research has shifted due to an  
535 explosion in omics technologies and large-scale initiatives like the Human and Earth  
536 Microbiome Projects<sup>52,53</sup>. The traditionally static “one host, one microbe” view has given way to  
537 one that is more dynamic and complex, taking into account the highly contextual nature of  
538 symbiotic relationships and involvement of diverse multi-member microbial communities. This  
539 paradigm shift has generated several new challenges; chiefly, the demand for more efficient  
540 genetic manipulation of wild and novel symbiotic bacterial lineages. Addressing this problem is  
541 critical to experimentally unravelling the cellular and molecular determinants of host–microbe  
542 systems.

543 The impetus behind the genetic tools and approaches described in this work emerged  
544 from setbacks encountered while attempting to manipulate members of the zebrafish intestinal  
545 microbiota. The diversity of species and strains exposed several key inadequacies and  
546 weaknesses in conventional techniques, including the lack of domestication-free strategies for  
547 donor cell counterselection, poor modularity of available tools, and intractability of allelic  
548 exchange. Therefore, we designed tools and methods to circumvent these points of failure and  
549 quickly adapt to unforeseen idiosyncrasies of species or strains. In this way, an individual  
550 researcher or laboratory can focus on a single operating procedure using a centralized set of  
551 tools while being empowered to innovate when needed.

552

553

554

555 **Utility of the Tools Produced by this Work**

556 An extensive collection of molecular tools is available for genetically manipulating bacteria;  
557 however, many can only be used with a small number of species or strains. The siloed nature  
558 of genetic tools puts a significant burden on researchers looking to manipulate diverse  
559 bacterial lineages because it forces them to sift through and become familiar with numerous  
560 different vectors and protocols. Furthermore, for those working with novel and uncharacterized  
561 bacteria or new to performing genetic manipulations altogether, developing a molecular starter  
562 kit is overwhelming. We addressed these problems by constructing a set of standardized  
563 engineering vectors that streamline the process of making genetic knock-ins and knock-outs  
564 across different lineages. These tools are briefly summarized in Figure 9 and their features are  
565 discussed below.

566

567

## Figure 9

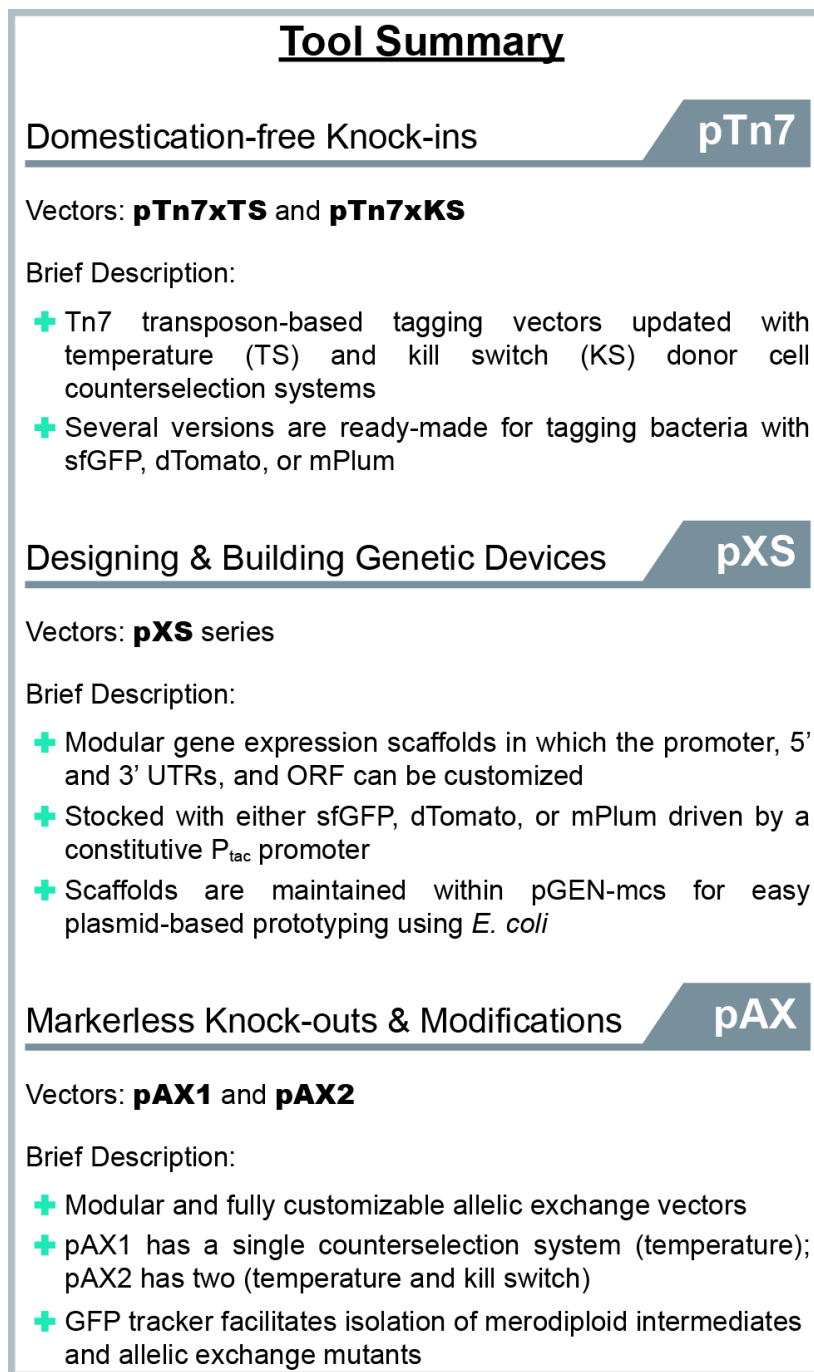

568

569 **Figure 9.** Summary of the genetic tools described in this work. The functions and features of  
570 each engineering vector is briefly summarized. Guide is organized based on technique or  
571 intended use.

572

573 *Minimizing laboratory-based domestication of wild bacterial isolates*

574 The deleterious nature of domestication is well-documented, yet it is often overlooked and  
575 domestication steps are unfortunately routinely performed because of their convenience<sup>23,24</sup>.  
576 Domestication is commonly used to improve genetic tractability or to help discern specific  
577 bacterial strains from other lineages within complex environments (e.g., the vertebrate  
578 intestine, water, or soil). Compensatory mutations can rescue or mask physiological defects  
579 associated with domestication in vitro<sup>25</sup>; however, there is no guarantee that critical aspects of  
580 symbiont biology, such as those involved in host engagement, are left unperturbed. Therefore,  
581 the accurate modeling of symbiotic interactions requires careful attention to preserving natural  
582 symbiont behaviors. The incorporation of temperature and kill switch-based domestication-free  
583 counterselection systems into a previously described Tn7 tagging vector<sup>27</sup>, which produced  
584 pTn7xTS and pTn7xKS (Figure 2), and the novel allelic exchange vectors pAX1 and pAX2  
585 developed in this work (Figure 5), offers ready-made tools for manipulating various symbiotic  
586 bacterial lineages in a way that preserves their natural physiology.

587

588 *Achieving broad utility through modularity*

589 The incredible genetic and phenotypic diversity of bacteria challenges cross-lineage  
590 compatibility of genetic tools. A major contributing factor to this problem is that many available  
591 tools are irreversibly constructed, which impedes the customization of important sequence  
592 motifs for different bacteria. We addressed this by building tools with highly modular  
593 architectures so that they can be easily reconfigured and are thus molecularly nimble. This  
594 feature makes it possible to continuously innovate and build off original designs. For example,  
595 expanding on the expression scaffolds within the pXS series of vectors (Figure 3 and Figure 3-

596 Figure Supplement 1), we have engineered more elaborate genetic devices, including  
597 reporters of gene expression and genetic switches. Additionally, the modularity of these  
598 vectors can be advantageous in situations where rational design is not possible due to the  
599 unavailability of suitable sequence elements; libraries in which constructs containing a single  
600 variable motif (e.g., a promoter or ribosome binding site) can be readily assembled and  
601 screened for optimal activity. While the flexibility of our expression scaffolds is conducive to  
602 further engineering, as built they have immediate utility for stably tagging bacteria and thus,  
603 facilitating the direct observation of symbionts within their natural host-associated  
604 environments. Illustrating this point, the mere fluorescent tagging of the zebrafish symbionts  
605 *Vibrio* ZWU0020 and *Aeromonas* ZOR0001 using these tools revealed that each bacterium  
606 interacts with the physically dynamic confines of the intestine in distinct ways and that this  
607 differential interplay unexpectedly shapes their apparent competition<sup>13</sup>. We also incorporated  
608 modularity into the design of the allelic exchange vectors pAX1 and pAX2 (Figure 5 and Figure  
609 5-Figure Supplement 1). Several elements within these vectors can be customized, including  
610 the antibiotic resistance genes, the fluorescent merodiploid tracker, and the kill switch. With  
611 this modularity, we are exploring alternative utilities of these vectors. For example, swapping  
612 the GFP merodiploid tracker for one that encodes a red fluorescent protein has allowed us to  
613 engineer GFP fusions at endogenous chromosomal loci. In total, tailorable tools such as those  
614 described here offer a way of tuning or customizing functionality to increase the experimental  
615 potential of bacterial lineages.

616

617

618

## 619 *Streamlining genetic manipulations with visual screening*

620 To improve the tractability of allelic exchange we used GFP to visually track recombination  
621 events (Figure 4). This simple update proved extremely powerful. It allowed merodiploids to be  
622 confidently identified and isolated while final mutant derivatives could be screened for with  
623 incredible sensitivity, sometimes being found as small subpopulations within merodiploid  
624 colonies growing on an agar plate (Figure 4 and Figure 6-Figure Supplements 1–3). The  
625 successful manipulation of a previously intractable bacterium (i.e., *Vibrio* ZOR0035) highlights  
626 the utility of this approach. Although conventional selection schemes (e.g., based on *sacB*) are  
627 adept at recovering mutants that arise at low frequencies due to rarely occurring recombination  
628 events, their use is contingent on specific conditions that can be difficult to translate between  
629 species or strains. By contrast, our visual screening approach operates freely across lineages  
630 and differs from selections in that it allows for the progression of recombination events to be  
631 more precisely monitored. As a result, the engineering and isolation of bacterial mutants is  
632 more efficient and attainable.

633

## 634 **Demonstrating New Avenues for Research: Comparative Study of Bacterial** 635 **Biogeography in the Zebrafish Gut**

636 The technical flexibility of the tools and methods developed in this work makes it easier to  
637 genetically manipulate many different bacterial lineages in parallel. This functionality greatly  
638 facilitates comparative studies aiming to disentangle unique and widely conserved aspects of  
639 host–microbe systems. Such investigations are important because many properties of complex  
640 host-associated microbial communities, like those comprising human microbiota<sup>54,55</sup>, are  
641 extremely variable and remain unexplained. Illustrating the potential for comparative



642 approaches, we exposed several uncharacterized phenomena by probing the colonization  
643 patterns and behaviors of multiple bacterial lineages native to the zebrafish intestine.

644       Upon initial examination, we found discordance between predicted and observed  
645 motility phenotypes in vivo. All strains examined carry flagellar genes and tend to be highly  
646 motile in vitro, yet several of them (e.g., *Enterobacter* ZOR0014, *Aeromonas* ZOR0001, and  
647 *Aeromonas* ZOR0002) display no obvious motility during intestinal colonization  
648 (Supplementary Movies 2–4). By contrast, some strains robustly sustain motility in vivo, most  
649 notably *Vibrio* ZWU0020, which appears to produce populations almost entirely made up of  
650 swimming cells (Supplementary Movie 1). There are several possible explanations for these  
651 behaviors that are not necessarily mutually exclusive. For example, they may be the result of  
652 bacteria dynamically responding to the intestinal environment and executing strain or lineage-  
653 specific colonization strategies. On the other hand, bacteria could be differentially susceptible  
654 to some form of host-mediated motility interference, which has recently been documented in  
655 mouse models<sup>56,57</sup>. Work focused on distinguishing these interactions is ongoing. Ultimately,  
656 this observation highlights the disconnect that can occur among in silico, in vitro, and in vivo  
657 approaches for studying bacterial symbioses. Considering how to best capture and interpret  
658 mechanistic insights across model systems will be critical to progress.

659       Our data additionally indicate that some strains display a relatively large amount of  
660 variation in growth mode and biogeography between hosts (e.g., *Aeromonas* ZOR0001,  
661 *Aeromonas* ZOR0002, and *Enterobacter* ZOR0014), while others do not (e.g., *Plesiomonas*  
662 ZOR0011, *Pseudomonas* ZWU0006, and *Vibrio* ZWU0020) (Figure 8). This variance is  
663 consistent with earlier reports showing that the structure of bacterial populations within the  
664 larval zebrafish gut can be highly dynamic, which is attributable in part to the physical forces of

665 intestinal peristalsis<sup>13,49</sup>. Yet some bacteria—for example, *Vibrio* ZWU0020—remain stable in  
666 the face of this perturbation through still undefined mechanisms<sup>13</sup>. Our observations with the  
667 *Vibrio* ZWU0020  $\Delta pomAB$  mutant suggest cell motility is involved.

668 Most strikingly, we discovered a strong correlation between the dominant growth mode  
669 of bacterial populations and their biogeography (Figure 8). While cell behavior is recognized to  
670 influence local population structure<sup>58,59</sup>, linking cell aggregation with a global pattern of spatial  
671 organization throughout the intestine is unanticipated and profound. A possible explanation for  
672 this pattern is that physical properties of the intestinal environment (e.g., its shape and/or  
673 peristaltic movement) act to spatially segregate planktonic and aggregated cells. Alternatively,  
674 bacteria may toggle between different growth modes in response to spatial cues generated by  
675 physiologically distinct regions along the length of the intestine. Going forward, a major  
676 objective will be to dissect the potential mechanisms of this relationship and importantly,  
677 understand how it generalizes both within and across host–microbe systems.

678

## 679 **Outlook**

680 Elucidating the rules that govern the assembly and function of bacterial symbioses requires  
681 studying a wide range of bacterial symbiont lineages<sup>1,2</sup>. Whether abundant, rare, divergent, or  
682 closely related, all potentially hold clues to how host–microbe systems work and how they can  
683 be exploited for biotechnology applications—from boosting food production to treating human  
684 disease. As more symbiotic relationships are uncovered and new model systems come online,  
685 the continued design and modernization of genetic approaches for streamlined manipulation of  
686 diverse bacterial lineages will be paramount. Although symbiotic bacteria were the primary  
687 subject for tool development in this work, the approaches we have described are equally

688 applicable to the study of free-living environmental bacteria. Importantly, the growing  
689 appreciation for the ubiquity of bacterial symbioses and their far-reaching influence on the lives  
690 of plants and animals is inspiring a highly cross-disciplinary generation of microbiologists with  
691 mixed and varied backgrounds. Therefore, it will be beneficial to work toward standardized  
692 tools and methods that foster the rigorous and accurate investigation of symbiont biology.

## 693 **MATERIALS AND METHODS**

### 694 **Animal care**

695 All experiments with zebrafish were done in accordance with protocols approved by the  
696 University of Oregon Institutional Animal Care and Use Committee and following standard  
697 protocols<sup>60</sup>.

698

### 699 **Gnotobiology**

700 Wild-type (AB x TU strain) zebrafish were derived germ-free (GF) and colonized with bacterial  
701 strains as previously described with slight modification<sup>61</sup>. Briefly, fertilized eggs from adult  
702 mating pairs were harvested and incubated in sterile embryo media (EM) containing ampicillin  
703 (100µg/ml), gentamicin (10µg/ml), amphotericin B (250ng/ml), tetracycline (1µg/ml), and  
704 chloramphenicol (1µg/ml) for ~6h. Embryos were then washed in EM containing 0.1%  
705 polyvinylpyrrolidone–iodine followed by EM containing 0.003% sodium hypochlorite. Sterilized  
706 embryos were distributed into T25 tissue culture flasks containing 15ml sterile EM at a density  
707 of one embryo per ml and incubated at 28–30°C prior to bacterial colonization. Embryos were  
708 sustained on yolk-derived nutrients and not fed during experiments. For bacterial mono-  
709 association, bacterial strains were grown overnight in LB liquid media with shaking at 30°C,  
710 and prepared for inoculation by pelleting 1ml of culture for 2 min at 7,000 x g, and washing  
711 once in sterile EM. Bacterial strains were individually added to the water column of single  
712 flasks containing 4-day old larval zebrafish at a final density of ~10<sup>6</sup> bacteria/ml. Bacterial  
713 colonization patterns were assessed 24h later by live imaging of three separate 5-day old  
714 zebrafish hosts per bacterial strain. Three animals were determined to be adequate for

715 capturing general colonization features of each bacterial strain based on at least two previous  
716 independent qualitative assessments of colonization patterns.

717

### 718 **Bacterial strains and culture**

719 All wild and recombinant bacterial strains used or created in this study are listed in  
720 Supplementary File 1. Archived stocks of bacteria are maintained in 25% glycerol at -80°C.  
721 Prior to manipulations or experiments, bacteria were directly inoculated into 5ml Luria-Bertani  
722 (LB) media (10g/L NaCl, 5g/L yeast extract, 12g/L tryptone, 1g/L glucose) and grown for ~16h  
723 (overnight) shaking at 30°C, except for *E. coli* HS, which was grown at 37°C. For growth on  
724 solid media, tryptic soy agar was used. 10µg/ml gentamicin was used to select recombinant  
725 strains tagged with the Tn7 transposon, which was modified to carry a gentamicin resistance  
726 gene. When selecting merodiploid intermediates made using pAX1 or pAX2, which carry  
727 resistance to both gentamicin and chloramphenicol, either 10µg/ml gentamicin or 5µg/ml  
728 chloramphenicol was used. Selection of rifampicin-domesticated variants was done using  
729 100µg/ml rifampicin.

730

### 731 **Molecular techniques and reagents**

732 *E. coli* strains used for molecular cloning and conjugation, and plasmids used or created during  
733 this work are listed in Supplementary File 2. *E. coli* were typically grown in 5ml LB liquid media  
734 at 30°C or 37°C with shaking in the presence of appropriate antibiotic selection to maintain  
735 plasmids. For propagation on solid media, LB agar was used. Antibiotic concentrations used  
736 were as follows: 100µg/ml ampicillin, 20µg/ml chloramphenicol, 10µg/ml gentamicin, and  
737 10µg/ml tetracycline. Supplementary File 3 lists all DNA primers used for polymerase chain

738 reactions (PCR), which are organized based on their “Wiles Primer” (WP) number. Unless  
739 specifically noted, standard molecular techniques were applied and reagents were used  
740 according to manufacturer instructions. Restriction enzymes and other molecular biology  
741 reagents for PCR and nucleic acid modifications were obtained from New England BioLabs  
742 (Ipswich, MA). Various kits for plasmid and PCR amplicon purification were obtained from  
743 Zymo Research (Irvine, CA). The Wizard Genomic DNA Purification Kit (Promega, Madison,  
744 WI) was used for isolating bacterial genomic DNA. DNA oligonucleotides for PCR were  
745 synthesized by Integrated DNA Technologies (Coralville, IA). Sanger sequencing was done by  
746 Sequetech (Mountain View, CA). Custom gene synthesis was done by GenScript (Piscataway,  
747 NJ). A Leica MZ10 F fluorescence stereomicroscope with 1.0x, 1.6x, and 2.0x objectives and  
748 Leica DFC365 FX camera were used for screening and imaging fluorescent bacterial colonies  
749 (Leica, Wetzlar, Germany). Images were captured and processed using standard Leica  
750 Application Suite software and ImageJ<sup>62</sup>. Nucleotide sequences of 16S rRNA genes used for  
751 phylogenetic analysis are provided in Supplementary File 4, and were obtained via “The  
752 Integrated Microbial Genomes & Microbiome Samples” (IMG/M) website  
753 (<https://img.jgi.doe.gov/m/>)<sup>63</sup> or the RNAmmer web tool<sup>64</sup>. 16S rRNA sequences were aligned  
754 using Clustal Omega<sup>65</sup> and an unrooted phylogenetic tree was drawn using the Phylodendron  
755 web tool (<http://iubio.bio.indiana.edu:7131/treeapp/treeprint-form.html>).

756

### 757 **Plasmid construction**

758 The plasmid-based tools developed in this work have been deposited at Addgene (Cambridge,  
759 MA), along with their sequences (<https://www.addgene.org/>). Supplementary File 5 contains  
760 annotated nucleotide sequences of select genetic parts that were used to build plasmids and

761 gene expression scaffolds. Details on how plasmids were specifically constructed are provided  
762 in Supplementary File 6.

763

#### 764 **Domestication-free Tn7 tagging using pTn7xTS and pTn7xKS**

765 A detailed Tn7 tagging protocol based on pTn7xTS and pTn7xKS—which includes  
766 optimization and troubleshooting steps, and notes on strain-specific procedures—is provided in  
767 Supplementary File 7. Generally, and as outlined in Figure 2, triparental conjugation was  
768 performed between a single target bacterial strain, an *E. coli* SM10 donor strain carrying the  
769 transposase-containing pTNS2 helper plasmid, and an *E. coli* SM10 donor strain carrying  
770 either a pTn7xTS or pTn7xKS domestication-free tagging vector. Prior to mating, bacteria were  
771 prepared by subculturing them to an approximate optical density of 0.4–0.6 at 600nm in LB  
772 media with required antibiotics and at the appropriate growth temperature. Cells were then  
773 combined 1:1:1 (500 $\mu$ l each), washed once by centrifugation and aspiration in 1ml LB media or  
774 0.7% NaCl, and suspended in a final 25 $\mu$ l volume of the same media used for washing. Next,  
775 the concentrated mating mixture was transferred to a 25mm-wide 0.45 $\mu$ m filter disc (EMD  
776 Millipore, Billerica MA; product #HAWP02500) that had been placed on top of a TSA plate.  
777 Once the mating mixture dried, the plate was incubated at 30°C for 3–5h. After incubation, the  
778 filter disc was placed in 1ml 0.7% NaCl within a 50ml conical tube and bacteria were dislodged  
779 by vortexing and pipetting. In cases where a pTn7xTS-based vector was used, 100 $\mu$ l of the  
780 bacterial suspension was spread onto a TSA plate containing gentamicin and incubated  
781 overnight at 37°C to select for recombinants. To ensure the recovery of low frequency  
782 recombinants, the remaining 900 $\mu$ l of the suspension was pelleted by centrifugation,  
783 suspended in 100 $\mu$ l 0.7% NaCl, and plated in the same way. In cases where a pTn7xKS-

784 based vector was used, 100 $\mu$ l of the bacterial suspension was spread onto a TSA plate  
785 containing gentamicin and 1mM isopropyl- $\beta$ -D-thiogalactoside (IPTG), and incubated overnight  
786 at 30°C. The remaining 900 $\mu$ l was prepared as above, plated on TSA with gentamicin and  
787 IPTG, and incubated at 30°C.

788 The following day, putative recombinant target bacteria were colony-purified by  
789 streaking on TSA without antibiotic selection at 30°C. Of note, when recombinant bacteria are  
790 tagged with a gene encoding a fluorescent protein, performing colony-purification in the  
791 absence of antibiotic selection followed by visual screening of fluorescence is a convenient  
792 way to verify that the Tn7 transposon has chromosomally integrated and the tagging vector  
793 has been lost. Purified clones were picked, cultured in LB media containing gentamicin, and  
794 genotyped by PCR to verify correct insertion of the Tn7 transposon at the *attTn7* site. The  
795 universal primer WP11, which anneals within the Tn7R region of the Tn7 transposon, was  
796 used with a species-specific primer that anneals to an adjacent chromosomal sequence within  
797 the 3' end of the *glmS* gene to generate a small (~250bp) amplicon if the transposon is  
798 present. Species-specific primers used were as follows: *Vibrio* ZOR0018, WP50; *Vibrio*  
799 ZOR0035, WP51; *Vibrio* ZOR0036, WP12; *Vibrio* ZWU0020, WP12; *Aeromonas* ZOR0001,  
800 WP49; *Aeromonas* ZOR0002, WP52; *Pseudomonas* ZWU0006, WP256; *Acinetobacter*  
801 ZOR0008, WP259; *Enterobacter* ZOR0014, WP257; *Plesiomonas* ZOR0011, WP260; *E. coli*  
802 HS, WP150; *Aeromonas* HM21, WP49; *Shewanella* MR-1, WP48.

803

#### 804 **Generation of markerless deletions via allelic exchange using pAX1 and pAX2**

805 A detailed protocol for carrying out allelic exchange using pAX1 and pAX2—which includes  
806 optimization and troubleshooting steps, and notes on strain-specific procedures—is provided in



807 Supplementary File 8. Briefly, and as summarized in Figure 4, allelic exchange cassettes for  
808 mediating markerless deletion of target genetic loci (i.e., the *pomAB* locus of *Vibrio* ZWU0020  
809 and *Aeromonas* ZOR0001) were generated through splice by overlap extension and inserted  
810 into a pAX-based vector. Next, diparental conjugation was performed between a single target  
811 bacterial strain (i.e., *Vibrio* ZWU0020 or *Aeromonas* ZOR0001) and an *E. coli* SM10 donor  
812 strain carrying the assembled allelic exchange vector. Prior to mating, bacteria were prepared  
813 by subculturing them to an approximate optical density of 0.4–0.6 at 600nm in LB media with  
814 required antibiotics and at the appropriate growth temperature. Cells were then combined 1:1  
815 (750 $\mu$ l each), washed once by centrifugation and aspiration in 1ml LB media or 0.7% NaCl,  
816 and suspended in a final 25 $\mu$ l volume of the same media used for washing. Next, the  
817 concentrated mating mixture was transferred to a 25mm-wide 0.45 $\mu$ m filter disc that had been  
818 placed on top of a TSA plate. Once the mating mixture dried, the plate was incubated at 30°C  
819 for 3–5h. After incubation, the filter disc was placed in 1ml 0.7% NaCl within a 50ml conical  
820 tube and bacteria were dislodged by vortexing and pipetting. For the generation of *Vibrio*  
821 ZWU0020  $\Delta pomAB$ , which employed a pAX1-related vector, 100 $\mu$ l of the bacterial suspension  
822 was spread onto a TSA plate containing gentamicin and incubated overnight at 37°C to select  
823 for merodiploids. The remaining 900 $\mu$ l of the suspension was pelleted by centrifugation,  
824 suspended in 100 $\mu$ l 0.7% NaCl, and plated in the same way to ensure recovery of rare  
825 recombinants. For the generation of *Aeromonas* ZOR0001  $\Delta pomAB$ , which employed a pAX2-  
826 based vector, 100 $\mu$ l of the bacterial suspension was spread onto a TSA plate containing  
827 gentamicin and 10ng/ml anhydrotetracycline (aTc), and incubated overnight at 30°C. The  
828 remaining 900 $\mu$ l was prepared as above, plated on TSA with gentamicin and aTc, and  
829 incubated at 30°C.

830 The following day, colonies of putative merodiploid target bacteria that were expressing  
831 the GFP tracker were purified by streaking on TSA without antibiotic selection at 30°C. This  
832 purification step also served to verify that the allelic exchange vector had integrated into the  
833 chromosome. Purified clones were picked, cultured in LB media containing gentamicin to  
834 maintain their merodiploid state, and archived as a frozen stock. To screen for second  
835 recombination events, merodiploids were cultured overnight in LB media without antibiotic  
836 selection and spread onto several TSA plates, again without antibiotic selection, at a density  
837 that allowed ~100–200 discrete colonies to form. Colonies exhibiting partial or complete loss of  
838 GFP expression were purified by streaking on TSA at 30°C. Putative mutants were screened  
839 and genotyped by PCR using primers that flanked the modified locus, which produced two  
840 differently sized amplicons that represented the wild-type and mutant alleles. Primers WP163  
841 and WP164 were used to genotype *Vibrio* ZWU0020  $\Delta pomAB$  mutants and primers WP192  
842 and WP195 were used to genotype *Aeromonas* ZOR0001  $\Delta pomAB$  mutants.

843

#### 844 **In vitro growth measurements**

845 In vitro growth of bacterial strains was assessed using the FLUOstar Omega microplate reader  
846 (BMG LABTECH, Offenburg, Germany). Prior to growth measurements, bacteria were grown  
847 overnight in 5ml LB media at 30°C with shaking. Cultures were diluted 1:100 into fresh LB  
848 media and dispensed in quadruplicate (i.e., four technical replicates) (200 $\mu$ l/ well) into a sterile  
849 96 well clear flat bottom tissue culture-treated microplate (Corning, Corning, NY; product  
850 #3585). Absorbance measurements at 600nm were then recorded every 30 minutes for 16  
851 hours (or until stationary phase) at 30°C with shaking. Growth measurements were repeated at

852 least two independent times for each strain (i.e., two biological replicates) with consistent  
853 results. Data were exported and graphed using GraphPad Prism 6 software.

854

### 855 **Swim motility assays**

856 Prior to the assessment of swimming motility, bacteria were grown overnight in 5ml LB media  
857 at 30°C with shaking. 1ml of bacterial culture was then washed by centrifuging cells at 7,000xg  
858 for 2 minutes, aspirating media, and suspending in 1ml 0.7% NaCl. This centrifugation/  
859 aspiration wash step was repeated once more and bacteria were suspended in a final volume  
860 of 1ml 0.7% NaCl. 1µl of washed bacterial culture was then inoculated into a TSA plate  
861 containing 0.2% agar (30g/L tryptic soy broth and 2g/L bacto agar). Swim plates were  
862 incubated at 30°C for 5–7h and imaged on a Gel Doc XR+ Imaging System (Bio-Rad,  
863 Hercules, CA). Motility assays were repeated at least two independent times (i.e., two  
864 biological replicates) with consistent results.

865

### 866 **Spot tests**

867 *E. coli* SM10 donor cells carrying vectors that contain temperature and/or kill switch-based  
868 post-conjugation counterselection systems were grown overnight in LB media with required  
869 antibiotics and at the appropriate growth temperatures. For assessing temperature-based  
870 counterselection, ten-fold serial dilutions were made on TSA plates containing gentamicin and  
871 incubated overnight at 30°C or 37°C. For assessing kill switch-based counterselection, ten-fold  
872 serial dilutions were made on TSA plates containing gentamicin +/- 1mM IPTG (in the case of  
873 pTn7xKS) or 10ng/ml aTc (in the case of pAX2) and incubated overnight at 30°C. Plates were  
874 imaged on a Bio-Rad Gel Doc XR+ Imaging System. All spot tests were performed at least two

875 independent times (i.e., two biological replicates), each including at least two technical  
876 replicates, with consistent results.

877

### 878 **Live Imaging**

879 Live larval zebrafish were imaged using a home-built light sheet fluorescence microscope  
880 described in detail elsewhere<sup>49,66</sup>. In brief, a thin sheet of laser light is obtained by rapidly  
881 scanning the excitation beam with a galvanometer mirror. Fluorescence emission is captured  
882 by an objective lens mounted perpendicular to the sheet. 3D images are obtained by  
883 translating the sample along the detection axis. The entire volume of the intestine  
884 (approximately 1200x300x150 microns) is imaged in four sub-regions that are computationally  
885 registered after acquisition. Total acquisition time of a single intestine is less than 1 min with 1-  
886 micron steps between planes. For all images, the exposure time was 30ms and the excitation  
887 laser power was 5mW prior to entering the imaging chamber.

888

### 889 **Image Analysis**

890 Bacterial abundances and locations were estimated using the analysis pipeline described in<sup>49</sup>.  
891 In brief, we identify individual cells in 3D using a wavelet filtering-based algorithm<sup>67</sup> and identify  
892 multicellular aggregates using a graph-cut segmentation algorithm<sup>68</sup>. The number of cells in an  
893 aggregate is estimated by dividing the total aggregate intensity by the average intensity of  
894 individual bacteria. Individuals detected within an aggregate are discarded. One-dimensional  
895 population distributions are obtained by dividing the intestine into 5-micron bins constructed  
896 down the length of the intestine along a manually drawn line and assigning the centroid of  
897 each detected object to a bin. Global population centers are computed as the center of mass

898 of this 1D distribution. Of note, this analysis pipeline was originally developed and optimized  
899 for a different strain not imaged here<sup>49</sup> and its performance on the 8 present strains has not  
900 been rigorously assessed. Based on manual inspection and analysis, we estimate an  
901 uncertainty of at most 10% for the planktonic fraction and for the population center of mass,  
902 which is certainly more than adequate to detect the global trends we report.

903 **ACKNOWLEDGEMENTS**

904 We would like to thank numerous members of the Guillemin lab for their willingness to test and  
905 provide feedback on the genetic tools developed in this work, particularly Dr. Annah Rolig and  
906 Dr. Cathy Robinson. We would also like to thank Dr. Andrew Camilli for his generosity in  
907 sharing overlap extension and allelic exchange protocols. This project was supported through  
908 the M.J. Murdock Charitable Trust and an award from the Kavli Microbiome Ideas Challenge, a  
909 project led by the American Society for Microbiology in partnership with the American  
910 Chemical Society and the American Physical Society and supported by The Kavli Foundation.  
911 Work was also supported by the National Science Foundation under Awards 0922951 and  
912 1507115. Authors received funding from the National Institutes of Health (NIH,  
913 <http://www.nih.gov/>), P50GM09891 to KG, F32AI112094 to TJW, and T32GM007759 to BHS.  
914 The funders had no role in study design, data collection and analysis, decision to publish, or  
915 preparation of the manuscript.

916 **COMPETING INTERESTS**

917 The authors declare that the tools and methods described in this work are the subject of an  
918 ongoing patent application.

919 **REFERENCES**

- 920 (1) McFall-Ngai, M.; Hadfield, M. G.; Bosch, T. C. G.; Carey, H. V; Domazet-Lošo, T.;  
921 Douglas, A. E.; Dubilier, N.; Eberl, G.; Fukami, T.; Gilbert, S. F.; Hentschel, U.; King, N.;  
922 Kjelleberg, S.; Knoll, A. H.; Kremer, N.; Mazmanian, S. K.; Metcalf, J. L.; Neelson, K.;  
923 Pierce, N. E.; Rawls, J. F.; Reid, A.; Ruby, E. G.; Rumpho, M.; Sanders, J. G.; Tautz, D.;  
924 Wernegreen, J. J. Animals in a Bacterial World, a New Imperative for the Life Sciences.  
925 *Proc. Natl. Acad. Sci. U. S. A.* **2013**, *110* (9), 3229–3236 DOI:  
926 10.1073/pnas.1218525110.
- 927 (2) Blaser, M. J.; Cardon, Z. G.; Cho, M. K.; Dangl, J. L.; Donohue, T. J.; Green, J. L.;  
928 Knight, R.; Maxon, M. E.; Northen, T. R.; Pollard, K. S.; Brodie, E. L. Toward a Predictive  
929 Understanding of Earth’s Microbiomes to Address 21st Century Challenges. *MBio* **2016**,  
930 *7* (3), e00714-16 DOI: 10.1128/mBio.00714-16.
- 931 (3) Dey, N.; Wagner, V. E.; Blanton, L. V; Cheng, J.; Fontana, L.; Haque, R.; Ahmed, T.;  
932 Gordon, J. I. Regulators of Gut Motility Revealed by a Gnotobiotic Model of Diet-  
933 Microbiome Interactions Related to Travel. *Cell* **2015**, *163* (1), 95–107 DOI:  
934 10.1016/j.cell.2015.08.059.
- 935 (4) Cox, L. M.; Yamanishi, S.; Sohn, J.; Alekseyenko, A. V; Leung, J. M.; Cho, I.; Kim, S. G.;  
936 Li, H.; Gao, Z.; Mahana, D.; Zárate Rodriguez, J. G.; Rogers, A. B.; Robine, N.; Loke, P.;  
937 Blaser, M. J. Altering the Intestinal Microbiota during a Critical Developmental Window  
938 Has Lasting Metabolic Consequences. *Cell* **2014**, *158* (4), 705–721 DOI:  
939 10.1016/j.cell.2014.05.052.
- 940 (5) Kostic, A. D.; Gevers, D.; Siljander, H.; Vatanen, T.; Hyötyläinen, T.; Hämäläinen, A.-M.;  
941 Peet, A.; Tillmann, V.; Pöhö, P.; Mattila, I.; Lähdesmäki, H.; Franzosa, E. A.; Vaarala, O.;  
942 de Goffau, M.; Harmsen, H.; Ilonen, J.; Virtanen, S. M.; Clish, C. B.; Orešič, M.;  
943 Huttenhower, C.; Knip, M.; DIABIMMUNE Study Group, R. J.; Xavier, R. J. The  
944 Dynamics of the Human Infant Gut Microbiome in Development and in Progression  
945 toward Type 1 Diabetes. *Cell Host Microbe* **2015**, *17* (2), 260–273 DOI:  
946 10.1016/j.chom.2015.01.001.
- 947 (6) Sampson, T. R.; Mazmanian, S. K. Control of Brain Development, Function, and  
948 Behavior by the Microbiome. *Cell Host Microbe* **2015**, *17* (5), 565–576 DOI:  
949 10.1016/j.chom.2015.04.011.
- 950 (7) Brooks, A. W.; Kohl, K. D.; Brucker, R. M.; van Opstal, E. J.; Bordenstein, S. R.  
951 Phyllosymbiosis: Relationships and Functional Effects of Microbial Communities across  
952 Host Evolutionary History. *PLOS Biol.* **2016**, *14* (11), e2000225 DOI:  
953 10.1371/journal.pbio.2000225.
- 954 (8) Hanage, W. P. Microbiology: Microbiome Science Needs a Healthy Dose of Scepticism.  
955 *Nature* **2014**, *512* (7514), 247–248 DOI: 10.1038/512247a.
- 956 (9) Bäuml, A. J. Infection and Immunity Welcomes the New Microbiology. *Infect. Immun.*  
957 **2017**, *85* (7), e00255-17 DOI: 10.1128/IAI.00255-17.
- 958 (10) Busby, P. E.; Soman, C.; Wagner, M. R.; Friesen, M. L.; Kremer, J.; Bennett, A.; Morsy,  
959 M.; Eisen, J. A.; Leach, J. E.; Dangl, J. L. Research Priorities for Harnessing Plant  
960 Microbiomes in Sustainable Agriculture. *PLoS Biol.* **2017**, *15* (3), e2001793 DOI:  
961 10.1371/journal.pbio.2001793.
- 962 (11) Maxmen, A. Living Therapeutics: Scientists Genetically Modify Bacteria to Deliver Drugs.  
963 *Nat. Med.* **2017**, *23* (1), 5–7 DOI: 10.1038/nm0117-5.



- 964 (12) Garber, K. Drugging the Gut Microbiome. *Nat. Biotechnol.* **2015**, 33 (3), 228–231 DOI:  
965 10.1038/nbt.3161.
- 966 (13) Wiles, T. J.; Jemielita, M.; Baker, R. P.; Schlomann, B. H.; Logan, S. L.; Ganz, J.;  
967 Melancon, E.; Eisen, J. S.; Guillemin, K.; Parthasarathy, R. Host Gut Motility Promotes  
968 Competitive Exclusion within a Model Intestinal Microbiota. *PLOS Biol.* **2016**, 14 (7),  
969 e1002517 DOI: 10.1371/journal.pbio.1002517.
- 970 (14) Whitaker, W. R.; Shepherd, E. S.; Sonnenburg, J. L. Tunable Expression Tools Enable  
971 Single-Cell Strain Distinction in the Gut Microbiome. *Cell* **2017**, 169 (3), 538–546.e12  
972 DOI: 10.1016/j.cell.2017.03.041.
- 973 (15) Falkow, S. Molecular Koch's Postulates Applied to Microbial Pathogenicity. *Rev. Infect.*  
974 *Dis. 10 Suppl 2*, S274-6.
- 975 (16) Yaung, S. J.; Church, G. M.; Wang, H. H. Recent Progress in Engineering Human-  
976 Associated Microbiomes. In *Methods in molecular biology (Clifton, N.J.)*; 2014; Vol.  
977 1151, pp 3–25.
- 978 (17) Zac Stephens, W.; Burns, A. R.; Stagaman, K.; Wong, S.; Rawls, J. F.; Guillemin, K.;  
979 Bohannan, B. J. M. The Composition of the Zebrafish Intestinal Microbial Community  
980 Varies across Development. *ISME J.* **2016**, 10 (3), 644–654 DOI:  
981 10.1038/ismej.2015.140.
- 982 (18) Keller, P. J.; Schmidt, A. D.; Wittbrodt, J.; Stelzer, E. H. K. Reconstruction of Zebrafish  
983 Early Embryonic Development by Scanned Light Sheet Microscopy. *Science* **2008**, 322  
984 (5904), 1065–1069 DOI: 10.1126/science.1162493.
- 985 (19) Jin, D. J.; Gross, C. A. Mapping and Sequencing of Mutations in the Escherichia Coli  
986 rpoB Gene That Lead to Rifampicin Resistance. *J. Mol. Biol.* **1988**, 202 (1), 45–58.
- 987 (20) Hall, A. R.; Iles, J. C.; MacLean, R. C. The Fitness Cost of Rifampicin Resistance in  
988 *Pseudomonas Aeruginosa* Depends on Demand for RNA Polymerase. *Genetics* **2011**,  
989 187 (3), 817–822 DOI: 10.1534/genetics.110.124628.
- 990 (21) Paulander, W.; Maisnier-Patin, S.; Andersson, D. I. The Fitness Cost of Streptomycin  
991 Resistance Depends on rpsL Mutation, Carbon Source and RpoS ( $\sigma^S$ ). *Genetics*  
992 **2009**, 183 (2), 539–46, 1SI–2SI DOI: 10.1534/genetics.109.106104.
- 993 (22) Björkman, J.; Andersson, D. I. The Cost of Antibiotic Resistance from a Bacterial  
994 Perspective. *Drug Resist. Updat.* **2000**, 3 (4), 237–245 DOI: 10.1054/drup.2000.0147.
- 995 (23) Kang, Y.-S.; Park, W. Trade-off between Antibiotic Resistance and Biological Fitness in  
996 *Acinetobacter* Sp. Strain DR1. *Environ. Microbiol.* **2010**, 12 (5), 1304–1318 DOI:  
997 10.1111/j.1462-2920.2010.02175.x.
- 998 (24) Carroll, S. M.; Xue, K. S.; Marx, C. J. Laboratory Divergence of *Methylobacterium*  
999 *Extorquens* AM1 through Unintended Domestication and Past Selection for Antibiotic  
L000 Resistance. *BMC Microbiol.* **2014**, 14 (1), 2 DOI: 10.1186/1471-2180-14-2.
- L001 (25) Moura de Sousa, J.; Balbontín, R.; Durão, P.; Gordo, I. Multidrug-Resistant Bacteria  
L002 Compensate for the Epistasis between Resistances. *PLoS Biol.* **2017**, 15 (4), e2001741  
L003 DOI: 10.1371/journal.pbio.2001741.
- L004 (26) Stabb, E. V.; Ruby, E. G. RP4-Based Plasmids for Conjugation between Escherichia Coli  
L005 and Members of the Vibrionaceae. *Methods Enzymol.* **2002**, 358, 413–426.
- L006 (27) Choi, K.-H.; Gaynor, J. B.; White, K. G.; Lopez, C.; Bosio, C. M.; Karkhoff-Schweizer, R.  
L007 R.; Schweizer, H. P. A Tn7-Based Broad-Range Bacterial Cloning and Expression  
L008 System. *Nat. Methods* **2005**, 2 (6), 443–448 DOI: 10.1038/nmeth765.
- L009 (28) Datsenko, K. A.; Wanner, B. L. One-Step Inactivation of Chromosomal Genes in

- L010 Escherichia Coli K-12 Using PCR Products. *Proc. Natl. Acad. Sci. U. S. A.* **2000**, 97 (12),  
L011 6640–6645 DOI: 10.1073/pnas.120163297.
- L012 (29) Calos, M. P. DNA Sequence for a Low-Level Promoter of the Lac Repressor Gene and  
L013 an “Up” Promoter Mutation. *Nature* **1978**, 274 (5673), 762–765.
- L014 (30) Gerdes, K.; Bech, F. W.; Jørgensen, S. T.; Løbner-Olesen, A.; Rasmussen, P. B.;  
L015 Atlung, T.; Boe, L.; Karlstrom, O.; Molin, S.; von Meyenburg, K. Mechanism of  
L016 Postsegregational Killing by the Hok Gene Product of the parB System of Plasmid R1  
L017 and Its Homology with the relF Gene Product of the E. Coli relB Operon. *EMBO J.* **1986**,  
L018 5 (8), 2023–2029.
- L019 (31) Cheng, H.-Y.; Soo, V. W. C.; Islam, S.; McAnulty, M. J.; Benedik, M. J.; Wood, T. K.  
L020 Toxin GhoT of the GhoT/GhoS Toxin/antitoxin System Damages the Cell Membrane to  
L021 Reduce Adenosine Triphosphate and to Reduce Growth under Stress. *Environ.*  
L022 *Microbiol.* **2014**, 16 (6), 1741–1754 DOI: 10.1111/1462-2920.12373.
- L023 (32) Unoson, C.; Wagner, E. G. H. A Small SOS-Induced Toxin Is Targeted against the Inner  
L024 Membrane in Escherichia Coli. *Mol. Microbiol.* **2008**, 70 (1), 258–270 DOI:  
L025 10.1111/j.1365-2958.2008.06416.x.
- L026 (33) de Boer, H. A.; Comstock, L. J.; Vasser, M. The Tac Promoter: A Functional Hybrid  
L027 Derived from the Trp and Lac Promoters. *Proc. Natl. Acad. Sci. U. S. A.* **1983**, 80 (1),  
L028 21–25.
- L029 (34) Lane, M. C.; Alteri, C. J.; Smith, S. N.; Mobley, H. L. T. Expression of Flagella Is  
L030 Coincident with Uropathogenic Escherichia Coli Ascension to the Upper Urinary Tract.  
L031 *Proc. Natl. Acad. Sci.* **2007**, 104 (42), 16669–16674 DOI: 10.1073/pnas.0607898104.
- L032 (35) Olins, P. O.; Devine, C. S.; Rangwala, S. H.; Kavka, K. S. The T7 Phage Gene 10  
L033 Leader RNA, a Ribosome-Binding Site That Dramatically Enhances the Expression of  
L034 Foreign Genes in Escherichia Coli. *Gene* **1988**, 73 (1), 227–235.
- L035 (36) Olins, P. O.; Rangwala, S. H. A Novel Sequence Element Derived from Bacteriophage  
L036 T7 mRNA Acts as an Enhancer of Translation of the lacZ Gene in Escherichia Coli. *J.*  
L037 *Biol. Chem.* **1989**, 264 (29), 16973–16976.
- L038 (37) Oxender, D. L.; Zurawski, G.; Yanofsky, C. Attenuation in the Escherichia Coli  
L039 Tryptophan Operon: Role of RNA Secondary Structure Involving the Tryptophan Codon  
L040 Region. *Proc. Natl. Acad. Sci. U. S. A.* **1979**, 76 (11), 5524–5528.
- L041 (38) Pédelacq, J.-D.; Cabantous, S.; Tran, T.; Terwilliger, T. C.; Waldo, G. S. Engineering  
L042 and Characterization of a Superfolder Green Fluorescent Protein. *Nat. Biotechnol.* **2006**,  
L043 24 (1), 79–88 DOI: 10.1038/nbt1172.
- L044 (39) Shaner, N. C.; Campbell, R. E.; Steinbach, P. A.; Giepmans, B. N. G.; Palmer, A. E.;  
L045 Tsien, R. Y. Improved Monomeric Red, Orange and Yellow Fluorescent Proteins Derived  
L046 from Discosoma Sp. Red Fluorescent Protein. *Nat. Biotechnol.* **2004**, 22 (12), 1567–  
L047 1572 DOI: 10.1038/nbt1037.
- L048 (40) Wang, L.; Jackson, W. C.; Steinbach, P. A.; Tsien, R. Y. Evolution of New Nonantibody  
L049 Proteins via Iterative Somatic Hypermutation. *Proc. Natl. Acad. Sci. U. S. A.* **2004**, 101  
L050 (48), 16745–16749 DOI: 10.1073/pnas.0407752101.
- L051 (41) Rasko, D. A.; Rosovitz, M. J.; Myers, G. S. A.; Mongodin, E. F.; Fricke, W. F.; Gajer, P.;  
L052 Crabtree, J.; Sebahia, M.; Thomson, N. R.; Chaudhuri, R.; Henderson, I. R.; Sperandio,  
L053 V.; Ravel, J. The Pangenome Structure of Escherichia Coli: Comparative Genomic  
L054 Analysis of E. Coli Commensal and Pathogenic Isolates. *J. Bacteriol.* **2008**, 190 (20),  
L055 6881–6893 DOI: 10.1128/JB.00619-08.

- L056 (42) Bomar, L.; Stephens, W. Z.; Nelson, M. C.; Velle, K.; Guillemin, K.; Graf, J. Draft  
L057 Genome Sequence of *Aeromonas Veronii* Hm21, a Symbiotic Isolate from the Medicinal  
L058 Leech Digestive Tract. *Genome Announc.* **2013**, 1 (5), e00800-13-e00800-13 DOI:  
L059 10.1128/genomeA.00800-13.
- L060 (43) Heidelberg, J. F.; Paulsen, I. T.; Nelson, K. E.; Gaidos, E. J.; Nelson, W. C.; Read, T. D.;  
L061 Eisen, J. A.; Seshadri, R.; Ward, N.; Methe, B.; Clayton, R. A.; Meyer, T.; Tsapin, A.;  
L062 Scott, J.; Beanan, M.; Brinkac, L.; Daugherty, S.; DeBoy, R. T.; Dodson, R. J.; Durkin, A.  
L063 S.; Haft, D. H.; Kolonay, J. F.; Madupu, R.; Peterson, J. D.; Umayam, L. A.; White, O.;  
L064 Wolf, A. M.; Vamathevan, J.; Weidman, J.; Impraim, M.; Lee, K.; Berry, K.; Lee, C.;  
L065 Mueller, J.; Khouri, H.; Gill, J.; Utterback, T. R.; McDonald, L. A.; Feldblyum, T. V.;  
L066 Smith, H. O.; Venter, J. C.; Neals, K. H.; Fraser, C. M. Genome Sequence of the  
L067 Dissimilatory Metal Ion-reducing Bacterium *Shewanella Oneidensis*. *Nat. Biotechnol.*  
L068 **2002**, 20 (11), 1118–1123 DOI: 10.1038/nbt749.
- L069 (44) Hamilton, C. M.; Aldea, M.; Washburn, B. K.; Babitzke, P.; Kushner, S. R. New Method  
L070 for Generating Deletions and Gene Replacements in *Escherichia Coli*. *J. Bacteriol.* **1989**,  
L071 171 (9), 4617–4622.
- L072 (45) van Aartsen, J. J.; Rajakumar, K. An Optimized Method for Suicide Vector-Based Allelic  
L073 Exchange in *Klebsiella Pneumoniae*. *J. Microbiol. Methods* **2011**, 86 (3), 313–319 DOI:  
L074 10.1016/j.mimet.2011.06.006.
- L075 (46) Faulds-Pain, A.; Wren, B. W. Improved Bacterial Mutagenesis by High-Frequency Allele  
L076 Exchange, Demonstrated in *Clostridium Difficile* and *Streptococcus Suis*. *Appl. Environ.*  
L077 *Microbiol.* **2013**, 79 (15), 4768–4771 DOI: 10.1128/AEM.01195-13.
- L078 (47) Blomfield, I. C.; Vaughn, V.; Rest, R. F.; Eisenstein, B. I. Allelic Exchange in *Escherichia*  
L079 *Coli* Using the *Bacillus Subtilis* *sacB* Gene and a Temperature-Sensitive pSC101  
L080 Replicon. *Mol. Microbiol.* **1991**, 5 (6), 1447–1457.
- L081 (48) Edwards, R. A.; Keller, L. H.; Schifferli, D. M. Improved Allelic Exchange Vectors and  
L082 Their Use to Analyze 987P Fimbria Gene Expression. *Gene* **1998**, 207 (2), 149–157.
- L083 (49) Jemielita, M.; Taormina, M. J.; Burns, A. R.; Hampton, J. S.; Rolig, A. S.; Guillemin, K.;  
L084 Parthasarathy, R. Spatial and Temporal Features of the Growth of a Bacterial Species  
L085 Colonizing the Zebrafish Gut. *MBio* **2014**, 5 (6), e01751-14 DOI: 10.1128/mBio.01751-  
L086 14.
- L087 (50) Lickwar, C. R.; Camp, J. G.; Weiser, M.; Cocchiaro, J. L.; Kingsley, D. M.; Furey, T. S.;  
L088 Sheikh, S. Z.; Rawls, J. F. Genomic Dissection of Conserved Transcriptional Regulation  
L089 in Intestinal Epithelial Cells. *PLOS Biol.* **2017**, 15 (8), e2002054 DOI:  
L090 10.1371/journal.pbio.2002054.
- L091 (51) Wallace, K. N.; Akhter, S.; Smith, E. M.; Lorent, K.; Pack, M. Intestinal Growth and  
L092 Differentiation in Zebrafish. *Mech. Dev.* **2005**, 122 (2), 157–173 DOI:  
L093 10.1016/j.mod.2004.10.009.
- L094 (52) Turnbaugh, P. J.; Ley, R. E.; Hamady, M.; Fraser-Liggett, C. M.; Knight, R.; Gordon, J. I.  
L095 The Human Microbiome Project. *Nature* **2007**, 449 (7164), 804–810 DOI:  
L096 10.1038/nature06244.
- L097 (53) Gilbert, J. A.; Jansson, J. K.; Knight, R. The Earth Microbiome Project: Successes and  
L098 Aspirations. *BMC Biol.* **2014**, 12 (1), 69 DOI: 10.1186/s12915-014-0069-1.
- L099 (54) Falony, G.; Joossens, M.; Vieira-Silva, S.; Wang, J.; Darzi, Y.; Faust, K.; Kurilshikov, A.;  
L100 Bonder, M. J.; Valles-Colomer, M.; Vandeputte, D.; Tito, R. Y.; Chaffron, S.; Rymenans,  
L101 L.; Verspecht, C.; De Sutter, L.; Lima-Mendez, G.; Dhoe, K.; Jonckheere, K.; Homola,

- L102 D.; Garcia, R.; Tigchelaar, E. F.; Eeckhautd, L.; Fu, J.; Henckaerts, L.; Zhernakova, A.;  
L103 Wijmenga, C.; Raes, J. Population-Level Analysis of Gut Microbiome Variation. *Science*  
L104 (80-. ). **2016**, 352 (6285), 560–564 DOI: 10.1126/science.aad3503.
- L105 (55) Lloyd-Price, J.; Mahurkar, A.; Rahnnavard, G.; Crabtree, J.; Orvis, J.; Hall, A. B.; Brady,  
L106 A.; Creasy, H. H.; McCracken, C.; Giglio, M. G.; McDonald, D.; Franzosa, E. A.; Knight,  
L107 R.; White, O.; Huttenhower, C. Strains, Functions and Dynamics in the Expanded  
L108 Human Microbiome Project. *Nature* **2017** DOI: 10.1038/nature23889.
- L109 (56) Cullender, T. C.; Chassaing, B.; Janson, A.; Kumar, K.; Muller, C. E.; Werner, J. J.;  
L110 Angenent, L. T.; Bell, M. E.; Hay, A. G.; Peterson, D. A.; Walter, J.; Vijay-Kumar, M.;  
L111 Gewirtz, A. T.; Ley, R. E. Innate and Adaptive Immunity Interact to Quench Microbiome  
L112 Flagellar Motility in the Gut. *Cell Host Microbe* **2013**, 14 (5), 571–581 DOI:  
L113 10.1016/j.chom.2013.10.009.
- L114 (57) Okumura, R.; Kurakawa, T.; Nakano, T.; Kayama, H.; Kinoshita, M.; Motooka, D.; Gotoh,  
L115 K.; Kimura, T.; Kamiyama, N.; Kusu, T.; Ueda, Y.; Wu, H.; Iijima, H.; Barman, S.; Osawa,  
L116 H.; Matsuno, H.; Nishimura, J.; Ohba, Y.; Nakamura, S.; Iida, T.; Yamamoto, M.;  
L117 Umemoto, E.; Sano, K.; Takeda, K. Lypd8 Promotes the Segregation of Flagellated  
L118 Microbiota and Colonic Epithelia. *Nature* **2016**, 532 (7597), 117–121 DOI:  
L119 10.1038/nature17406.
- L120 (58) Donaldson, G. P.; Lee, S. M.; Mazmanian, S. K. Gut Biogeography of the Bacterial  
L121 Microbiota. *Nat. Rev. Microbiol.* **2015**, 14 (1), 20–32 DOI: 10.1038/nrmicro3552.
- L122 (59) Tropini, C.; Earle, K. A.; Huang, K. C.; Sonnenburg, J. L. The Gut Microbiome:  
L123 Connecting Spatial Organization to Function. *Cell Host Microbe* **2017**, 21 (4), 433–442  
L124 DOI: 10.1016/j.chom.2017.03.010.
- L125 (60) Westerfield, M. *The Zebrafish Book: A Guide for the Laboratory Use of Zebrafish (Danio*  
L126 *Rerio)*, 5th Editio.; University of Oregon Press: Eugene, 2007.
- L127 (61) Melancon, E.; Gomez De La Torre Canny, S.; Sichel, S.; Kelly, M.; Wiles, T. J.; Rawls, J.  
L128 F.; Eisen, J. S.; Guillemin, K. Best Practices for Germ-Free Derivation and Gnotobiotic  
L129 Zebrafish Husbandry. *Methods Cell Biol.* **2017**, 138, 61–100 DOI:  
L130 10.1016/bs.mcb.2016.11.005.
- L131 (62) Schneider, C. A.; Rasband, W. S.; Eliceiri, K. W. NIH Image to ImageJ: 25 Years of  
L132 Image Analysis. *Nat. Methods* **2012**, 9 (7), 671–675.
- L133 (63) Chen, I.-M. A.; Markowitz, V. M.; Chu, K.; Palaniappan, K.; Szeto, E.; Pillay, M.; Ratner,  
L134 A.; Huang, J.; Andersen, E.; Huntemann, M.; Varghese, N.; Hadjithomas, M.;  
L135 Tennessen, K.; Nielsen, T.; Ivanova, N. N.; Kyripides, N. C. IMG/M: Integrated Genome  
L136 and Metagenome Comparative Data Analysis System. *Nucleic Acids Res.* **2017**, 45 (D1),  
L137 D507–D516 DOI: 10.1093/nar/gkw929.
- L138 (64) Lagesen, K.; Hallin, P.; Rødland, E. A.; Stærfeldt, H.-H.; Rognes, T.; Ussery, D. W.  
L139 RNAMmer: Consistent and Rapid Annotation of Ribosomal RNA Genes. *Nucleic Acids*  
L140 *Res.* **2007**, 35 (9), 3100–3108 DOI: 10.1093/nar/gkm160.
- L141 (65) McWilliam, H.; Li, W.; Uludag, M.; Squizzato, S.; Park, Y. M.; Buso, N.; Cowley, A. P.;  
L142 Lopez, R. Analysis Tool Web Services from the EMBL-EBI. *Nucleic Acids Res.* **2013**, 41  
L143 (W1), W597–W600 DOI: 10.1093/nar/gkt376.
- L144 (66) Taormina, M. J.; Jemielita, M.; Stephens, W. Z.; Burns, A. R.; Troll, J. V.; Parthasarathy,  
L145 R.; Guillemin, K. Investigating Bacterial-Animal Symbioses with Light Sheet Microscopy.  
L146 *Biol. Bull.* **2012**, 223 (1), 7–20 DOI: 10.1086/BBLv223n1p7.
- L147 (67) Olivo-Marin, J.-C. Extraction of Spots in Biological Images Using Multiscale Products.

- l148            *Pattern Recognit.* **2002**, 35 (9), 1989–1996 DOI: 10.1016/S0031-3203(01)00127-3.  
l149 (68) Boykov, Y.; Kolmogorov, V. An Experimental Comparison of Min-Cut/max- Flow  
l150 Algorithms for Energy Minimization in Vision. *IEEE Trans. Pattern Anal. Mach. Intell.*  
l151 **2004**, 26 (9), 1124–1137 DOI: 10.1109/TPAMI.2004.60.  
l152

l153 **FIGURE SUPPLEMENT AND SUPPLEMENTARY MOVIE LEGENDS**

l154 **Figure 2-Figure Supplement 1.** Spot tests demonstrating temperature-based  
l155 counterselection of *E. coli* SM10 donor cells using the Tn7-tagging vector pTn7xTS. Ten-fold  
l156 serial dilutions of *E. coli* SM10 carrying either the control vector pUC18R6KT-mini-Tn7T-GM  
l157 (pTW56) or its temperature-sensitive derivative pTn7xTS were plated on tryptic soy agar  
l158 containing 10µg/ml gentamicin and cultivated overnight at 30°C or 37°C. Functional  
l159 differences between each vector are highlighted in vector maps. *ori<sub>R6K</sub>*, *pir*-dependent origin of  
l160 replication; *ori<sub>101</sub>/repA101<sup>ts</sup>*, temperature-sensitive origin of replication.

l161

l162 **Figure 2-Figure Supplement 2.** Spot tests demonstrating kill switch-based counterselection of  
l163 *E. coli* SM10 donor cells using the Tn7-tagging vector pTn7xKS. **(A)** Kill switch design.  
l164 Expression of the three toxin-encoding genes *hokB*, *ghoT*, and *tisB*—which impair ATP  
l165 synthesis—is controlled by the LacI-repressible promoter P<sub>tac</sub> (O+). “O+” indicates presence of  
l166 the lac operator sequence in the promoter. Tight regulation of toxin genes is achieved by using  
l167 the P<sub>lacIQ</sub> promoter variant to control transcription of *lacI*, which drives ten-fold higher  
l168 expression over native P<sub>lacI</sub>. The allolactose analogue isopropyl-β-D-thiogalactoside (IPTG) is  
l169 used for kill switch induction. **(B)** Ten-fold serial dilutions of *E. coli* SM10, carrying pUC18T-  
l170 mini-Tn7T-GM (pTW54) derivatives that either contain a kill switch with no toxin genes  
l171 (pTW88), three toxin genes (pTn7xKS), or a single toxin gene (pTW98), were plated on tryptic  
l172 soy agar containing 10µg/ml gentamicin +/- 1mM IPTG and cultivated overnight at 30°C.  
l173 Functional differences between each vector are highlighted in vector maps. *ori<sub>ColE1</sub>*, high copy  
l174 number origin of replication.

l175

L176 **Figure 3-Figure Supplement 1.** Design features of expression scaffolds and modernized Tn7-  
L177 tagging vectors. **(A)** The previously described high-retention pGEN-mcs vector was chosen for  
L178 maintaining, modifying, and prototyping expression scaffolds. Scaffolds encoding either sfGFP  
L179 (pXS-sfGFP, green circle), dTomato (pXS-dTomato, red circle), or mPlum (pXS-mPlum, purple  
L180 circle) were built into the multiple cloning site (mcs). Scaffold orientations relative to vector are  
L181 noted. As in Figure 3, a scaffold diagram highlights the interchangeable sequence motifs and  
L182 cyan arrowheads below mark the locations of restriction sites for making modifications.  
L183 Presence of green, red, or purple circles next to restriction enzyme names indicate the  
L184 availability of that site within each respective vector. \*It should be noted that the AgeI enzyme  
L185 cuts 190bp into the 15A origin of replication. Other pGEN-mcs features: *ori*<sub>15A</sub>, broad host  
L186 range origin of replication; T1, transcriptional terminator; *par*, partitioning system from pSC101;  
L187 *amp*<sup>R</sup>, ampicillin resistance gene; *hok/sok*, toxin/antitoxin system; *parRM*, centromere-like  
L188 partitioning system. **(B)** Expression scaffolds were subcloned into the mcs of the temperature-  
L189 sensitive Tn7-tagging vector pTn7xTS (described in Figure 2A). The relative orientation of the  
L190 scaffolds is noted. Restriction site availability for each vector encoding either GFP (pTn7xTS-  
L191 sfGFP, green circle), dTomato (pTn7xTS-dTomato, red circle), or mPlum (pTn7xTS-mPlum,  
L192 purple circle) is outlined as in **A**. **(C)** Expression scaffolds were subcloned into the mcs of the  
L193 kill switch containing Tn7-tagging vector pTn7xKS (described in Figure 2C). The relative  
L194 orientation of the scaffolds is noted. Restriction site availability for each vector encoding either  
L195 GFP (pTn7xKS-sfGFP, green circle), dTomato (pTn7xKS-dTomato, red circle), or mPlum  
L196 (pTn7xKS-mPlum, purple circle) is outlined as in **A**.  
L197

L198 **Figure 3-Figure Supplement 2.** Domestication-free tagging of *Vibrio* ZWU0020. **(A)** Diagram  
L199 shows the conserved *attTn7* insertion site for Tn7 (Tn) downstream of the *glmS* gene within  
L200 *Vibrio* ZWU0020's chromosome (chr). Cargo comprises one of three genes encoding either  
L201 sfGFP, dTomato, or mPlum. "T" denotes transcriptional terminators; unch., uncharacterized.  
L202 **(B)** PCR-confirmation of Tn7 insertion variants carrying different fluorescent markers made  
L203 using temperature and kill switch-based tagging vectors (i.e., pTn7xTS and pTn7xKS,  
L204 respectively). Black arrows above gene diagrams mark primer annealing sites in addition to the  
L205 expected amplicon size for successful insertion events. Representative DNA gels showing  
L206 genotyping results are provided to the right of each diagram. Wild-type ZWU0020 (WT)  
L207 produces no amplicon because the transposon is not present. **(C)** Plotted is the average  
L208 optical density at 600nm ( $OD_{600}$ ) vs. time (hours) of WT ZWU0020, and its undomesticated  
L209 fluorescently tagged derivatives (*attTn7::sfGFP*, *attTn7::dTomato*, and *attTn7::mPlum*), during  
L210 shaking growth in LB broth at 30°C. Range bars are based on four technical replicates. **(D)**  
L211 Swim motility WT ZWU0020 and the indicated fluorescently tagged variants from **C** in 0.2%  
L212 tryptic soy agar at 30°C.

L213

L214 **Figure 5-Figure Supplement 1.** Design features of customizable allelic exchange vectors. **(A)**  
L215 Molecular scaffolds that hold antibiotic resistance genes, a merodiploid (MD) tracker, and a  
L216 domestication-free kill switch system are partitioned by restriction sites (cyan arrowheads). A  
L217 *SmaI* restriction site, which produces blunt ends when cleaved, serves as a flexible point of  
L218 entry for cloned allelic exchange cassettes. Full vector assemblies are shown for **(B)** pAX1 and  
L219 **(C)** pAX2. The hashed line within each vector schematic highlights the scaffold regions shown  
L220 to the right, which list the locations of available restriction sites for engineering and provide



L221 element details. Terminators  $T_0$  and  $T_1$  prevent transcriptional read-through of the Smal  
L222 cloning site and interference of kill switch elements. *ori*<sub>101</sub>/*repA*101<sup>ts</sup>, temperature-sensitive  
L223 origin of replication; *oriT*, origin of transfer; *gent*<sup>R</sup>, gentamicin resistance gene; *clm*<sup>R</sup>,  
L224 chloramphenicol resistance gene; *amp*<sup>R</sup>, ampicillin resistance gene;  $P_{gent}$ , *gent* promoter;  $P_{clm}$ ,  
L225 *clm* promoter;  $P_{CP25}$ , synthetic constitutive promoter; GFP<sup>mut3.1</sup>, GFP variant; *tisB*, *ghoT*, and  
L226 *hokB* encode toxic peptides; *tetR* encodes the repressor TetR;  $P_{TetO}$ , synthetic TetR-  
L227 repressible promoter;  $P_{tac}$  (O-), synthetic constitutive promoter without lac operator sequence.

L228

L229 **Figure 5-Figure Supplement 2.** Spot tests demonstrating temperature and kill switch-based  
L230 counterselection of *E. coli* SM10 donor cells using the allelic exchange vectors pAX1 and  
L231 pAX2. Ten-fold serial dilutions of *E. coli* SM10 carrying either pAX1 or pAX2 were plated on  
L232 tryptic soy agar (TSA) containing 10µg/ml gentamicin and cultivated overnight at 30°C or 37°C.  
L233 Results obtained with SM10/pTW56, which are also presented in Figure 2-Figure Supplement  
L234 1, are provided as a reference control. Functional differences between each vector are  
L235 highlighted. *ori*<sub>R6K</sub>, *pir*-dependent origin of replication; *ori*<sub>101</sub>/*repA*101<sup>ts</sup>, temperature-sensitive  
L236 origin of replication. **(B)** Ten-fold serial dilutions of *E. coli* SM10 carrying either pTW56 or pAX2  
L237 were plated on TSA containing 10µg/ml gentamicin +/- 10ng/ml anhydrotetracycline (aTc) and  
L238 cultivated overnight at 30°C or 37°C. As in **A**, functional differences between each vector are  
L239 highlighted in vector maps. *tisB*, *ghoT*, and *hokB* encode toxic peptides; *tetR* encodes the  
L240 repressor TetR.

L241

L242 **Figure 6-Figure Supplement 1.** Additional information related to the engineering of the *Vibrio*  
L243 ZWU0020  $\Delta pomAB$  deletion mutant. **(A)** *Vibrio* ZWU0020 *pomAB* merodiploids robustly

L244 express GFP. After outgrowth and plating on nonselective media, mosaic merodiploid colonies  
L245 exhibiting loss of GFP and thus, loss of the allelic exchange vector, can be isolated. Images  
L246 labeled “GFP” show GFP fluorescence and “darkfield” show total colony structure. **(B)** Plotted  
L247 is the average optical density at 600nm (OD<sub>600</sub>) vs. time (hours) of WT ZWU0020 and its  
L248  $\Delta pomAB$  derivative during shaking growth in LB broth at 30°C. Range bars are based on four  
L249 technical replicates.

L250

L251 **Figure 6-Figure Supplement 2.** Markerless deletion of *pomAB* in *Aeromonas veronii* using  
L252 the allelic exchange vector pAX2. **(A)** Top: wild-type *pomAB* locus in *Aeromonas veronii*  
L253 ZOR0001. Bottom: result of markerless *pomAB* deletion fuses the start codon of *pomA* to the  
L254 stop codon of *pomB*. Black arrows mark approximate primer annealing sites for genotyping  
L255 and the size of each amplification product is indicated. **(B)** *Aeromonas* ZOR0001 *pomAB*  
L256 merodiploids robustly express GFP. After outgrowth and plating on nonselective media,  
L257 mosaic merodiploid colonies exhibiting loss of GFP, and thus loss of the allelic exchange  
L258 vector, can be isolated. Images labeled “GFP” show GFP fluorescence and “darkfield” show  
L259 total colony structure. **(C)** Agarose gel showing PCR-based genotyping of wild-type (WT),  
L260 merodiploid (MD), and four putative  $\Delta pomAB$  ( $\Delta$ ) mutants. To verify the dual functionality of  
L261 pAX2, two merodiploids were isolated using either its temperature (T) or kill switch (K) donor  
L262 cell counterselection systems. Putative  $\Delta pomAB$  mutants were derived from “K” merodiploids.  
L263 Migration distances of WT and mutant alleles are indicated. Mutant 3 is an example of a wild-  
L264 type revertant, whereas 1, 2, and 4 are  $\Delta pomAB$  mutants. **(D)** Swim motility of WT ZOR0001  
L265 and the four putative  $\Delta pomAB$  mutants from **C** in 0.2% tryptic soy agar at 30°C. The attenuated  
L266 swimming phenotype of mutants 1, 2, and 4 corroborates genotyping results. Of note,

L267 *Aeromonas* ZOR0001 encodes multiple lateral flagellar systems in addition to one polar  
L268 flagellum; therefore, partial loss of motility is expected. (E) Plotted is the average optical  
L269 density at 600nm (OD<sub>600</sub>) vs. time (hours) of WT ZOR0001 and  $\Delta pomAB$  mutant 1 during  
L270 shaking growth in LB broth at 30°C. Range bars are based on four technical replicates.

L271

L272 **Figure 6-Figure Supplement 3.** Examples of various patterns of GFP loss observed within  
L273 merodiploid colonies. *Vibrio* ZWU0020 (top row) and *Aeromonas* ZOR0001 (bottom row)  
L274 merodiploid cells were plated on non-selective tryptic soy agar. After overnight growth,  
L275 colonies were screened for loss of GFP, which indicates that a second recombination event  
L276 has occurred. White arrowheads mark GFP-negative patches.

L277

L278 **Figure 7-Figure Supplement 1.** Additional images showing intestinal colonization patterns  
L279 and growth modes of zebrafish symbionts. (A) Cartoon diagram of a 5-day old larval zebrafish.  
L280 Purple dashed box outlines region imaged in C. (B) Diagram shows the boundaries of the bulb,  
L281 mid-gut, and distal gut within the larval intestine. (C) Maximum intensity projections of 3D  
L282 image stacks acquired by light sheet fluorescence microscopy for indicated bacterial strains.  
L283 Orange dotted outline marks the intestine in each image. Scale bar: 200 $\mu$ m.

L284

L285 **Figure 7-Figure Supplement 2.** Summary of traits exhibited by bacterial symbionts within the  
L286 larval zebrafish intestine.

L287

L288 **Figure 7-Figure Supplement 3.** Phylogenetic relatedness and summary of motility  
L289 phenotypes. Shown is an unrooted phylogenetic tree generated using full-length nucleotide

L290 sequences of the 16S rRNA gene from all strains manipulated in this study. Strains used for  
L291 live imaging are in bold black type and symbols denote motility phenotypes.

L292

L293 **Figure 7-Figure Supplement 4.** Motility of select strains in soft agar. Indicated strains were  
L294 inoculated in 0.2% tryptic soy agar and incubated at 30°C for ~5h. \**Pseudomonas* ZWU0006  
L295 exhibits a delay in swimming and advances after a 24h incubation period.

L296

L297 **Supplementary Movie 1.** Example of *Vibrio* ZWU0020 growth mode and behavior within the  
L298 zebrafish gut. Movie depicts live imaging of a single optical plane in the intestinal bulb of a 5-  
L299 day old larval zebrafish colonized with a 100:1 mixture of *Vibrio* ZWU0020 expressing  
L300 dTomato (left panel) or sfGFP (right panel). The GFP-tagged subpopulation highlights the  
L301 highly motile and planktonic nature of this strain within the intestine. Scale bars: 50µm.

L302

L303 **Supplementary Movie 2.** Example of *Enterobacter* ZOR0014 growth mode and behavior  
L304 within the zebrafish gut. Movie depicts live imaging of a single optical plane in the intestinal  
L305 bulb of a 5-day old larval zebrafish colonized with *Enterobacter* ZOR0014 expressing sfGFP. A  
L306 small portion of the *Enterobacter* mid-gut population can be seen fluxing into the bulb due to  
L307 peristaltic contractions. Non-motile cells are evident along with larger multicellular aggregates.  
L308 Scale bar: 50µm.

L309

L310 **Supplementary Movie 3.** Example of *Aeromonas* ZOR0001 growth mode and behavior within  
L311 the zebrafish gut. Movie depicts live imaging of a single optical plane in the intestinal mid-gut  
L312 of a 5-day old larval zebrafish colonized with *Aeromonas* ZOR0001 expressing sfGFP. Non-

L313 motile cells and small aggregates can be seen experiencing flux due to peristaltic contractions.

L314 Scale bar: 50 $\mu$ m.

L315

L316 **Supplementary Movie 4.** Example of *Aeromonas* ZOR0002 growth mode and behavior within

L317 the zebrafish gut. Movie depicts live imaging of a single optical plane in the intestinal bulb of a

L318 5-day old larval zebrafish colonized with *Aeromonas* ZOR0002 expressing sfGFP. Non-motile

L319 cells and small aggregates can be observed. Scale bar: 50 $\mu$ m.

L320

L321 **Supplementary Movie 5.** Example of *Vibrio* ZOR0036 growth mode and behavior within the

L322 zebrafish gut. Movie depicts live imaging of a single optical plane in the intestinal bulb of a 5-

L323 day old larval zebrafish colonized with *Vibrio* ZOR0036 expressing sfGFP. Highly motile cells

L324 as well as large multicellular aggregates can be observed. Scale bar: 50 $\mu$ m.

L325

L326 **Supplementary Movie 6.** Example of *Plesiomonas* ZOR0011 growth mode and behavior

L327 within the zebrafish gut. Movie depicts live imaging of a single optical plane in the intestinal

L328 bulb of a 5-day old larval zebrafish colonized with *Plesiomonas* ZOR0011 expressing sfGFP.

L329 Motile cells as well as large multicellular aggregates can be observed. Notably, the swim

L330 speed of *Plesiomonas* cells appears to be more moderate compared to *Vibrio* or

L331 *Pseudomonas* strains. Scale bar: 50 $\mu$ m.

L332

L333 **Supplementary Movie 7.** Example of *Pseudomonas* ZWU0006 growth mode and behavior

L334 within the zebrafish gut. Movie depicts live imaging of a single optical plane in the intestinal

L335 bulb of a 5-day old larval zebrafish colonized with *Pseudomonas* ZWU0006 expressing sfGFP.

L336 Highly motile cells as well as large multicellular aggregates can be observed. Scale bar: 50 $\mu$ m.

L337

L338 **Supplementary Movie 8.** Example of *Vibrio* ZWU0020  $\Delta pomAB$  growth mode and behavior

L339 within the zebrafish gut. Movie depicts live imaging of a single optical plane in the intestinal

L340 bulb of a 5-day old larval zebrafish colonized with *Vibrio* ZWU0020  $\Delta pomAB$  expressing

L341 dTomato. Non-motile cells and small aggregates can be observed. Scale bar: 50 $\mu$ m.

L342 **SUPPLEMENTARY AND SOURCE DATA FILE LEGENDS**

L343 **Supplementary File 1.** Wild and Recombinant Bacteria.

L344 **Supplementary File 2.** 16S rRNA Nucleotide Sequences.

L345 **Supplementary File 3.** *E. coli* Strains and Plasmids.

L346 **Supplementary File 4.** Primers.

L347 **Supplementary File 5.** Nucleotide Sequences of Select Genetic Parts.

L348 **Supplementary File 6.** Plasmid Construction.

L349 **Supplementary File 7.** Protocol: Tn7 tagging with pTn7xTS and pTn7xKS

L350 **Supplementary File 8.** Protocol: Allelic exchange with pAX1 and pAX2

L351 **Figure 1-Source Data 1.** Raw in vitro growth data for Figure 1A

L352 **Figure 3-Source Data 1.** Raw in vitro growth data for Figure 3-Figure Supplement 2C

L353 **Figure 6-Source Data 1.** Raw in vitro growth data for Figure 6-Figure Supplement 1B

L354 **Figure 6-Source Data 2.** Raw in vitro growth data for Figure 6-Figure Supplement 2E

L355 **Figure 8-Source Data 1.** Values plotted in Figure 8

SM10/pTW56

SM10/pTn7xTS

30°C

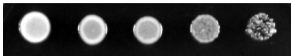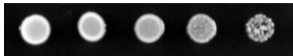

37°C

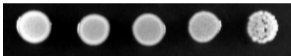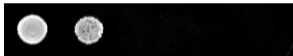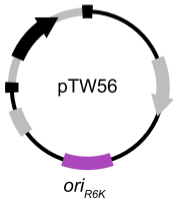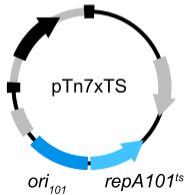



**A**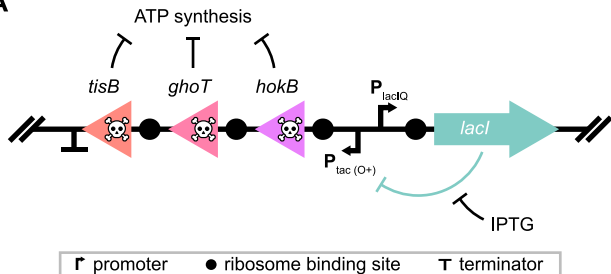**B**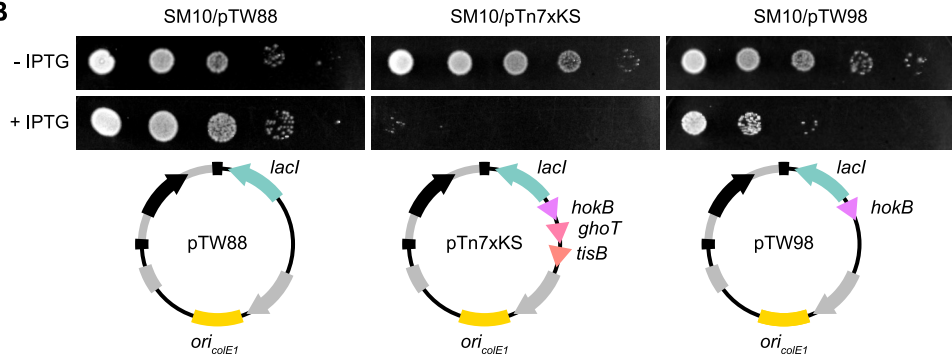

A

pGEN-based Expression Scaffolds

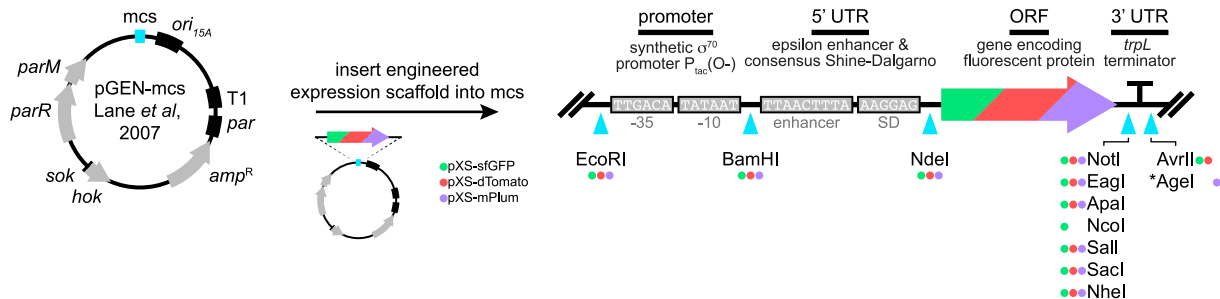

B

Tn7-tagging Vectors with Temperature-based Counterselection

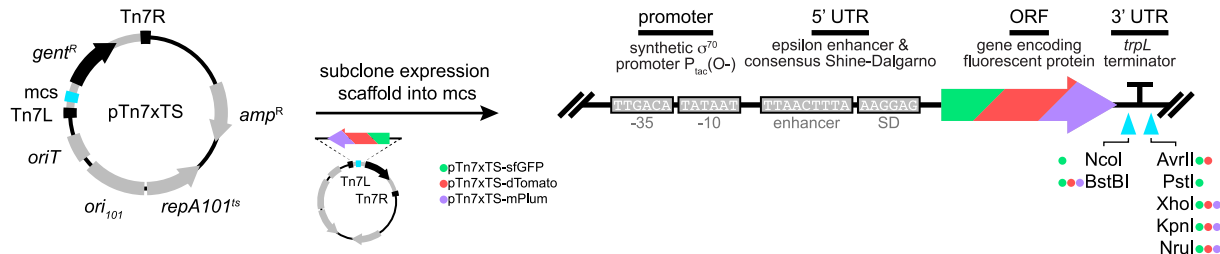

C

Tn7-tagging Vectors with Kill Switch-based Counterselection

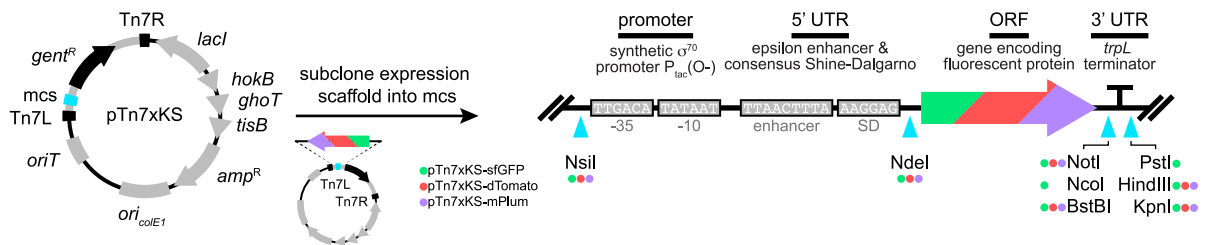

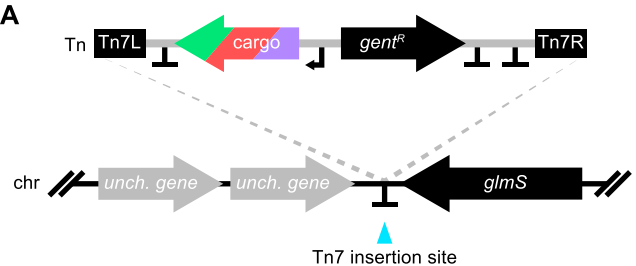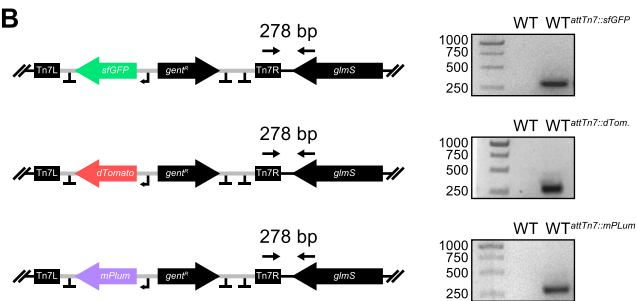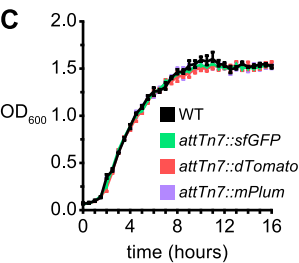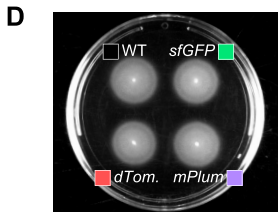

**A** design overview of allelic exchange vector scaffolds

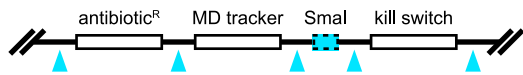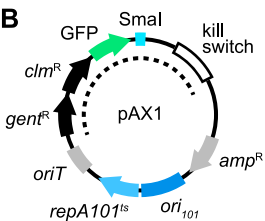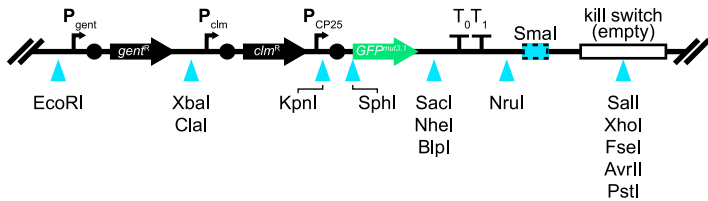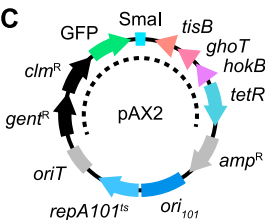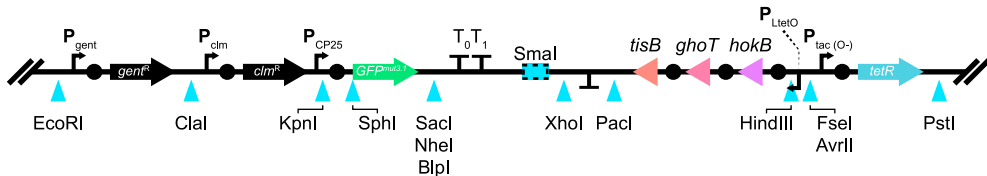

▭ promoter ● ribosome binding site T terminator

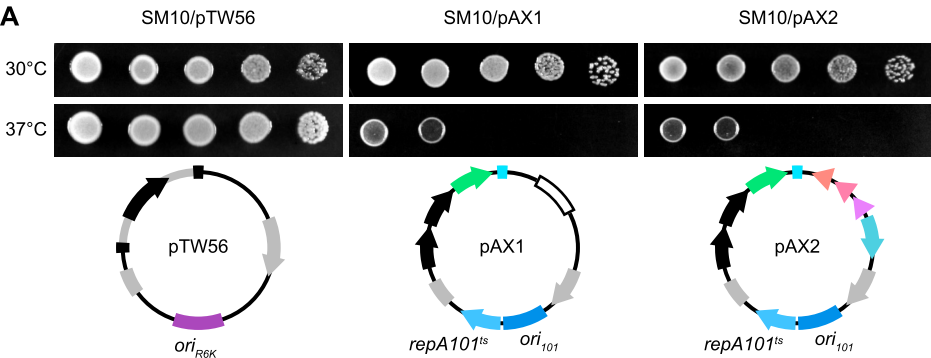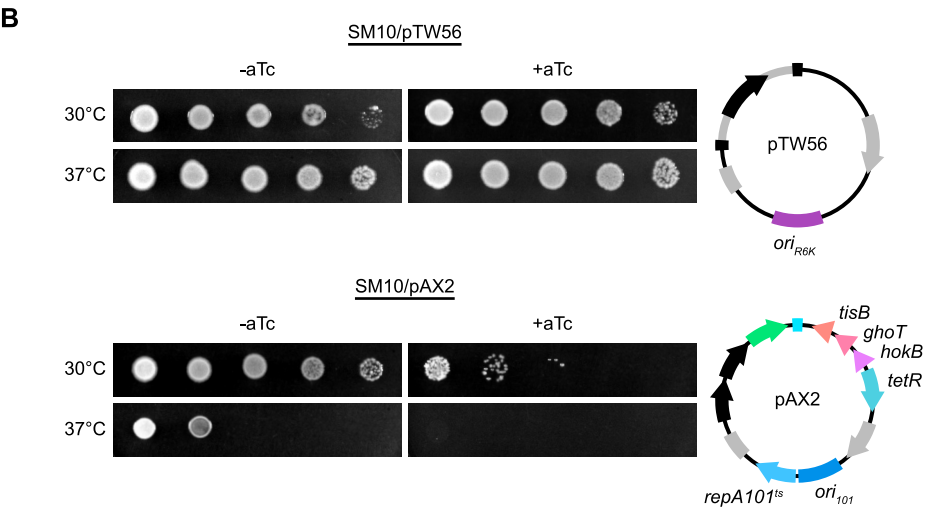

**A**

merodiploid colony

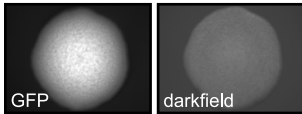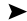merodiploid colony  
with mosaic loss of GFP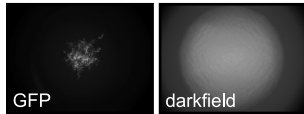**B**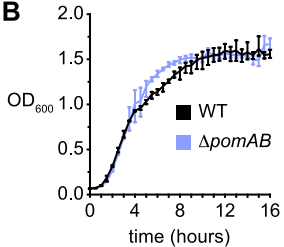

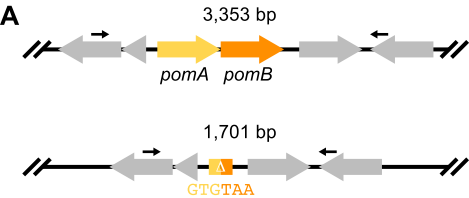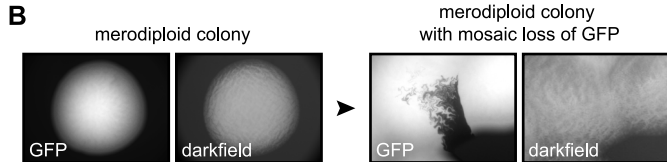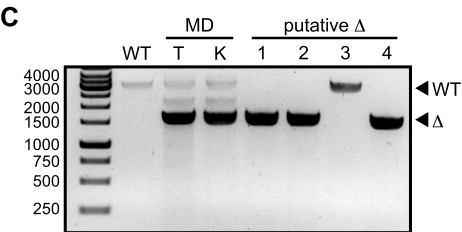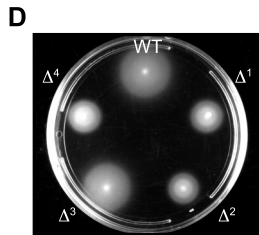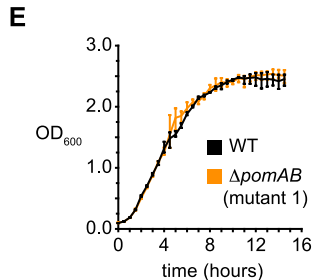

*Vibrio*  
ZWU0020

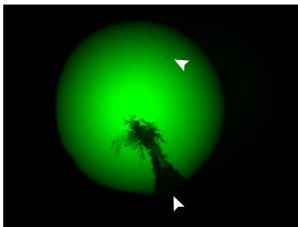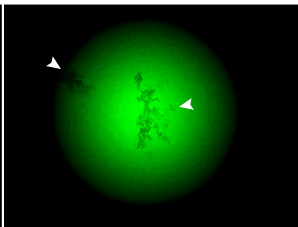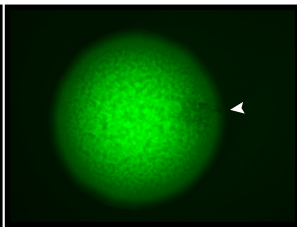

*Aeromonas*  
ZOR0001

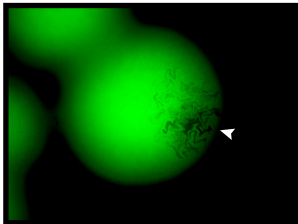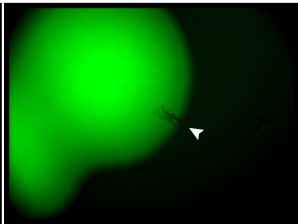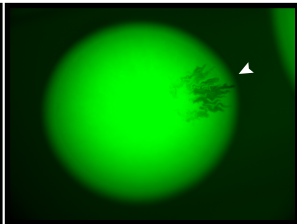



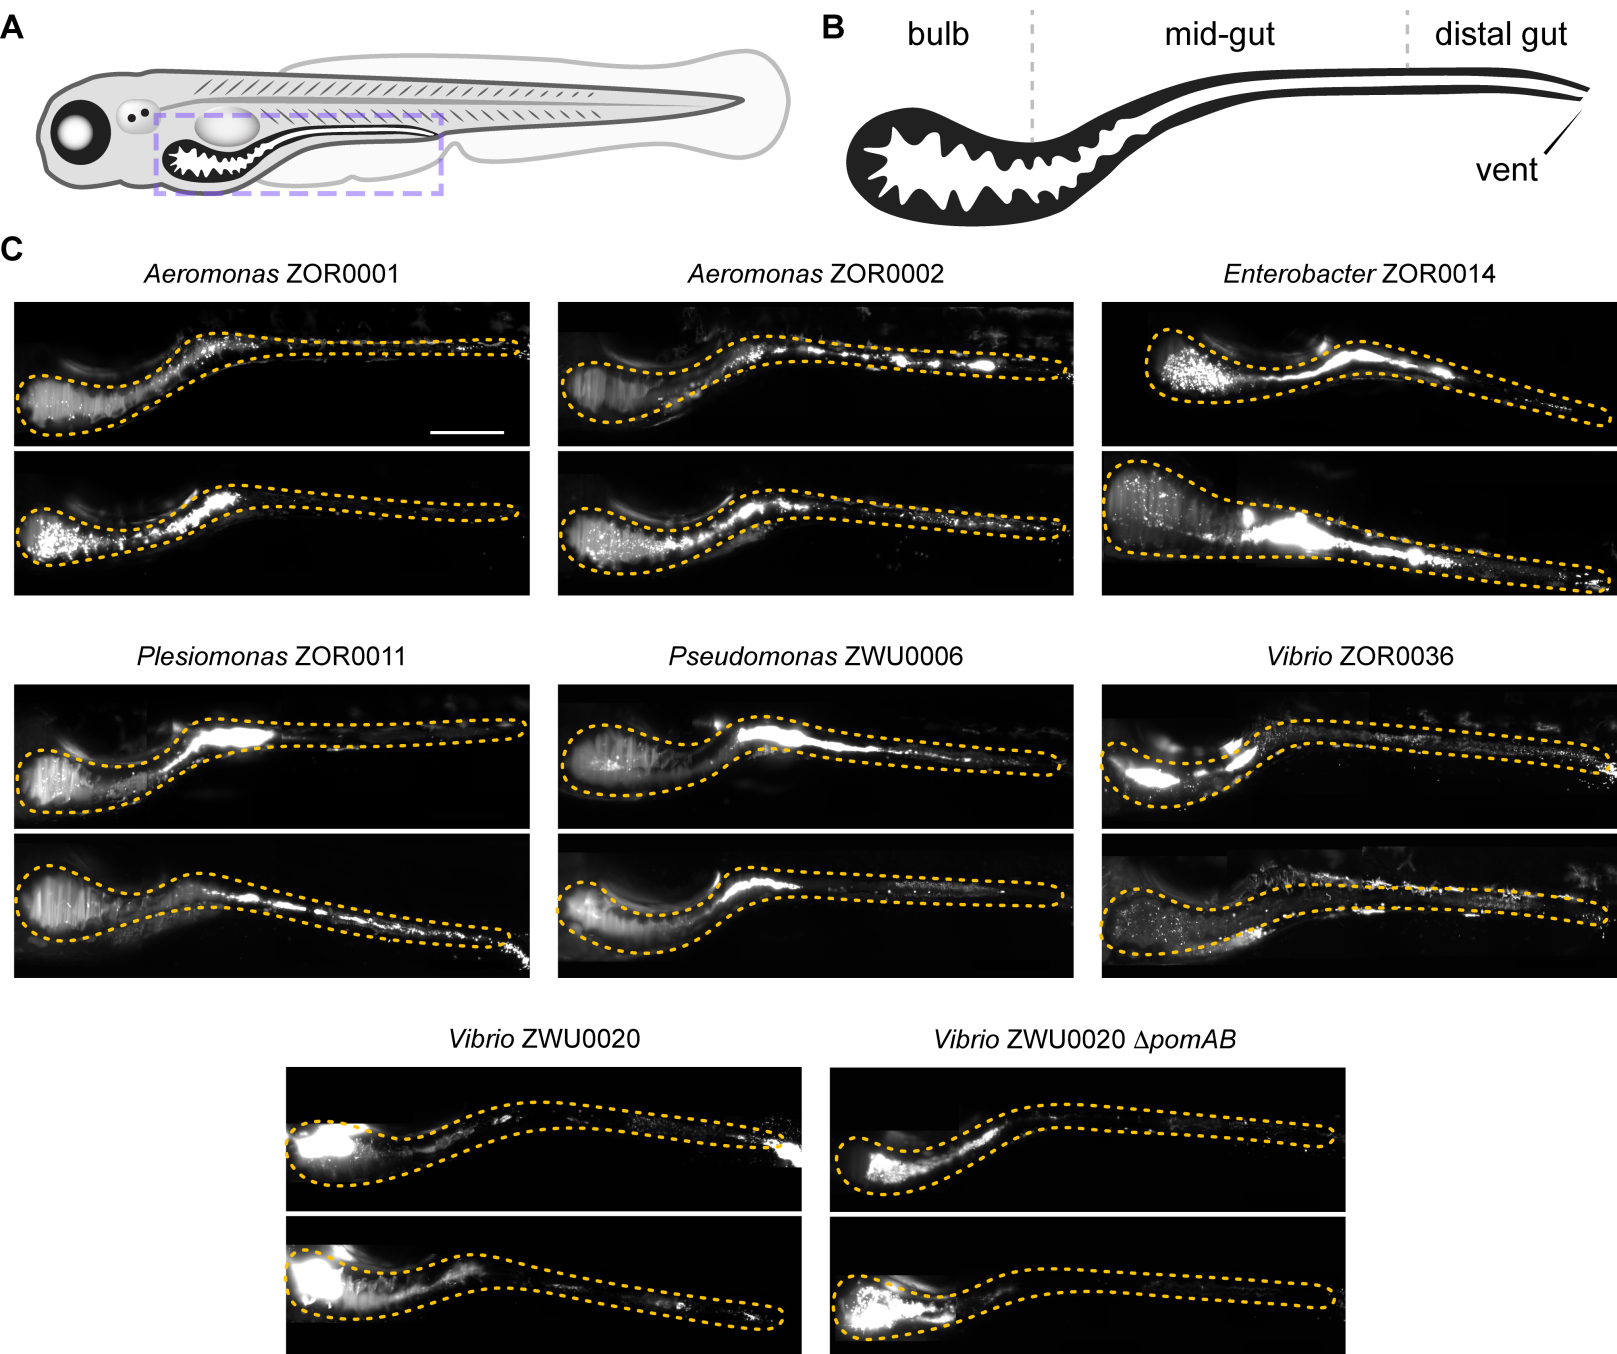

## Figure 7-Figure Supplement 2.

Summary of traits exhibited by bacterial symbionts within the larval zebrafish intestine.

| Strain                      | Median Abundance <sup>a</sup> | Dominant Growth Mode | Motile Individuals |
|-----------------------------|-------------------------------|----------------------|--------------------|
| <i>Aeromonas</i> ZOR0001    | $7.54 \times 10^3$            | Aggregated           | No                 |
| <i>Aeromonas</i> ZOR0002    | $5.41 \times 10^3$            | Aggregated           | No                 |
| <i>Enterobacter</i> ZOR0014 | $1.87 \times 10^4$            | Aggregated           | No                 |
| <i>Plesiomonas</i> ZOR0011  | $2.39 \times 10^4$            | Aggregated           | Yes                |
| <i>Pseudomonas</i> ZWU0006  | $1.19 \times 10^4$            | Aggregated           | Yes                |
| <i>Vibrio</i> ZOR0036       | $2.66 \times 10^3$            | Mixed                | Yes                |
| <i>Vibrio</i> ZWU0020       | $5.02 \times 10^4$            | Planktonic           | Yes                |
| ZWU0020 $\Delta pomAB$      | $8.17 \times 10^3$            | Mixed                | No                 |

<sup>a</sup>Population abundances were derived from three animals per strain and are based on segmentation of 3D images.

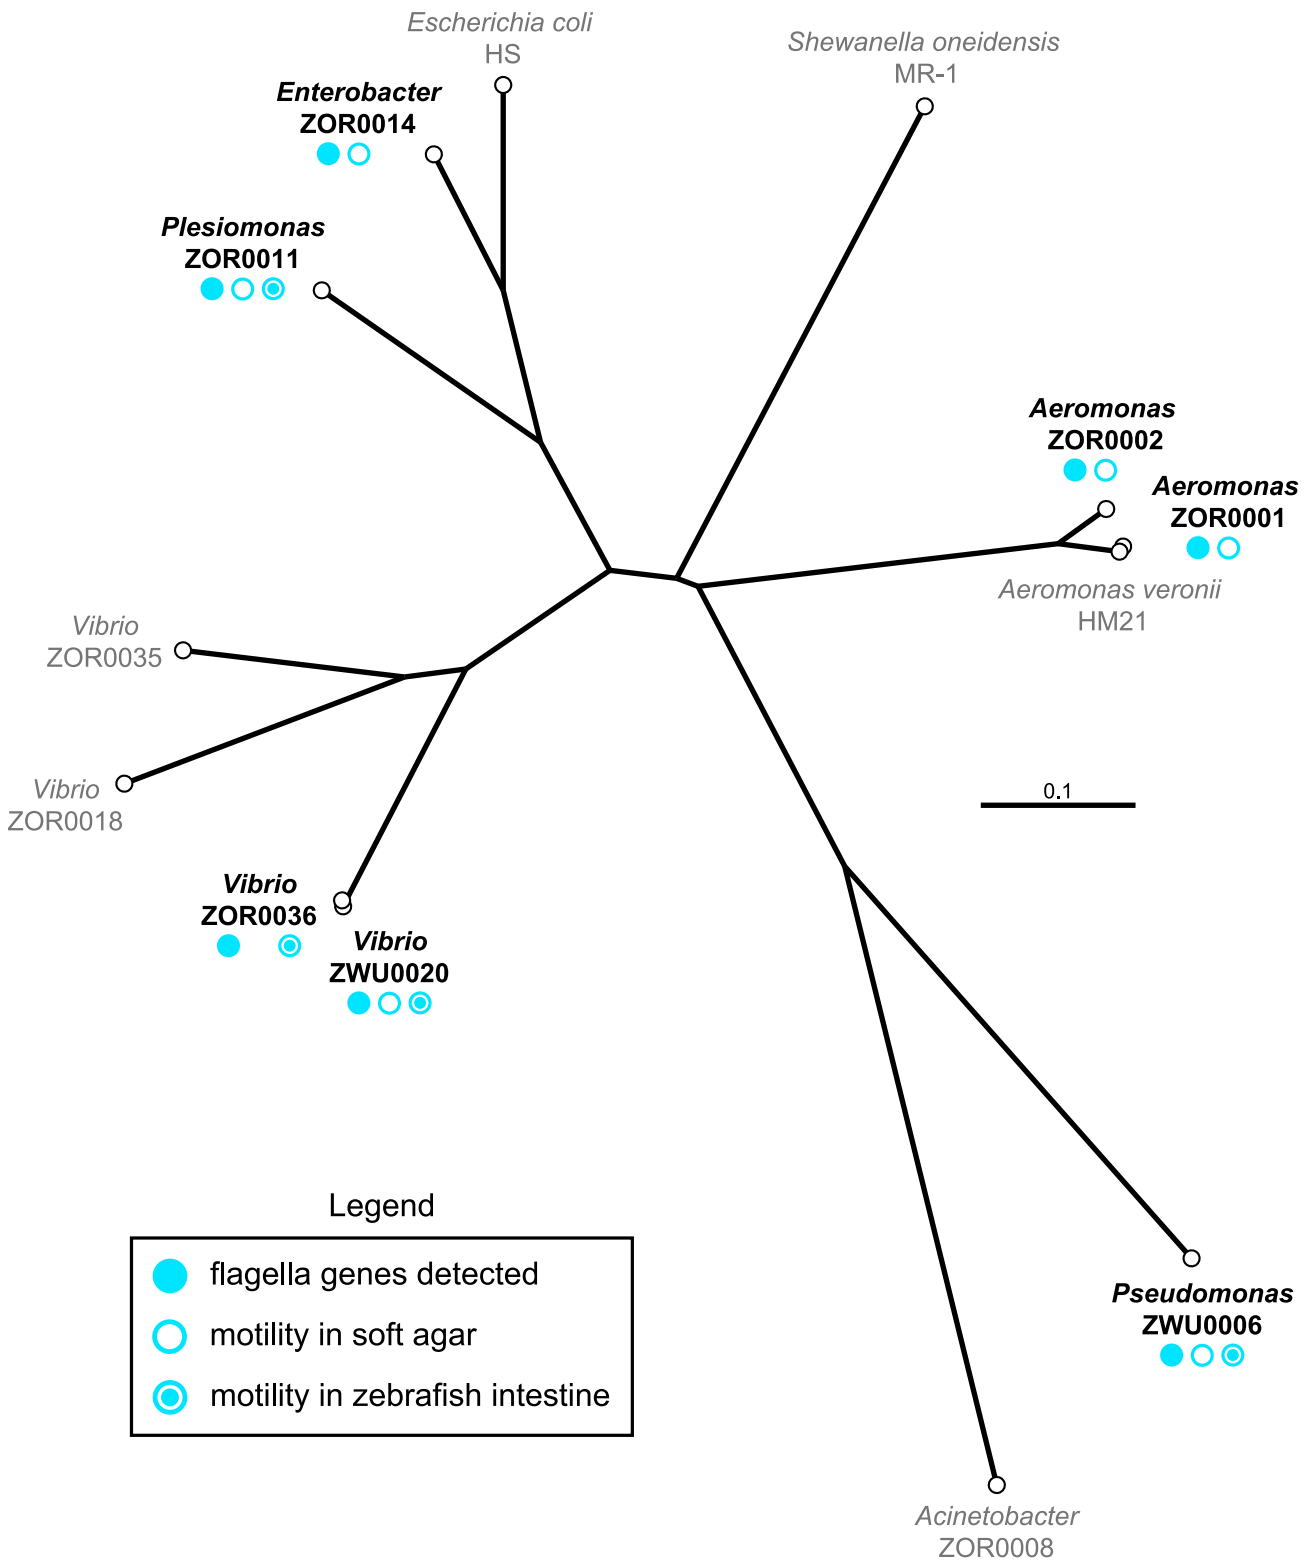

*Vibrio*  
ZWU0020

*Enterobacter*  
ZOR0014

*Vibrio*  
ZOR0036

*Plesiomonas*  
ZOR0011

*Aeromonas*  
ZOR0001

\**Pseudomonas*  
ZWU0006

*Aeromonas*  
ZOR0002

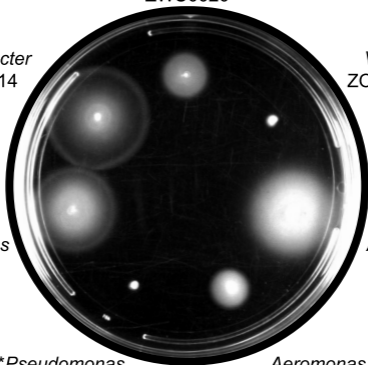

Source: https://www.biorxiv.org/content/10.1101/202861.full.pdf
